## Superabsorbent crosslinked bacterial cellulose biomaterials for chronic wound dressings

Daria Ciecholewska-Juśko<sup>a</sup>, Anna Żywicka<sup>a</sup>, Adam Junka<sup>b</sup>, Radosław Drozd<sup>a</sup>, Peter Sobolewski<sup>c</sup>, Paweł Migdał<sup>d</sup>, Urszula Kowalska<sup>e</sup>, Monika Toporkiewicz<sup>f</sup>, Karol Fijałkowski<sup>a\*</sup>

<sup>a</sup>Department of Microbiology and Biotechnology, Faculty of Biotechnology and Animal Husbandry, West Pomeranian University of Technology, Szczecin, Piastów 45, 70-311 Szczecin, Poland; [daria.ciecholewska@zut.edu.pl](mailto:daria.ciecholewska@zut.edu.pl); [anna.zywicka@zut.edu.pl](mailto:anna.zywicka@zut.edu.pl); [radoslaw.drozd@zut.edu.pl](mailto:radoslaw.drozd@zut.edu.pl); [karol.fijalkowski@zut.edu.pl](mailto:karol.fijalkowski@zut.edu.pl)

<sup>b</sup>Department of Pharmaceutical Microbiology and Parasitology, Wrocław Medical University, Borowska 211A, 50-556 Wrocław, Poland; [adam.junka@umed.wroc.pl](mailto:adam.junka@umed.wroc.pl)

<sup>c</sup>Department of Polymer and Biomaterials Science, Faculty of Chemical Technology and Engineering, West Pomeranian University of Technology, Szczecin, Piastów 45, 70-311 Szczecin, Poland; [psobolewski@zut.edu.pl](mailto:psobolewski@zut.edu.pl)

<sup>d</sup>Department of Environment, Hygiene and Animal Welfare, Faculty of Biology and Animal Science, Wrocław University of Environmental and Life Sciences, ul. Chełmońskiego 38C, 51-630 Wrocław, Poland; [pawel.migdal@upwr.edu.pl](mailto:pawel.migdal@upwr.edu.pl)

<sup>e</sup>Centre of Bioimmobilization and Innovative Packaging Materials, West Pomeranian University of Technology, Szczecin, Janickiego 35, 71-270 Szczecin, Poland; [urszula.kowalska@zut.edu.pl](mailto:urszula.kowalska@zut.edu.pl)

<sup>f</sup>Laboratory of Confocal Microscopy, Łukasiewicz Research Network – PORT Polish Center for Technology Development, Stabłowicka 147, 54-066 Wrocław, Poland; [monika.toporkiewicz@port.pl](mailto:monika.toporkiewicz@port.pl)

**\*Corresponding author:** Karol Fijałkowski, Department of Microbiology and Biotechnology, Faculty of Biotechnology and Animal Husbandry, West Pomeranian University of Technology, Szczecin, Piastów 45, 70-311 Szczecin, Poland. Tel.: + 091 449 6714; e-mail address: [karol.fijalkowski@zut.edu.pl](mailto:karol.fijalkowski@zut.edu.pl)

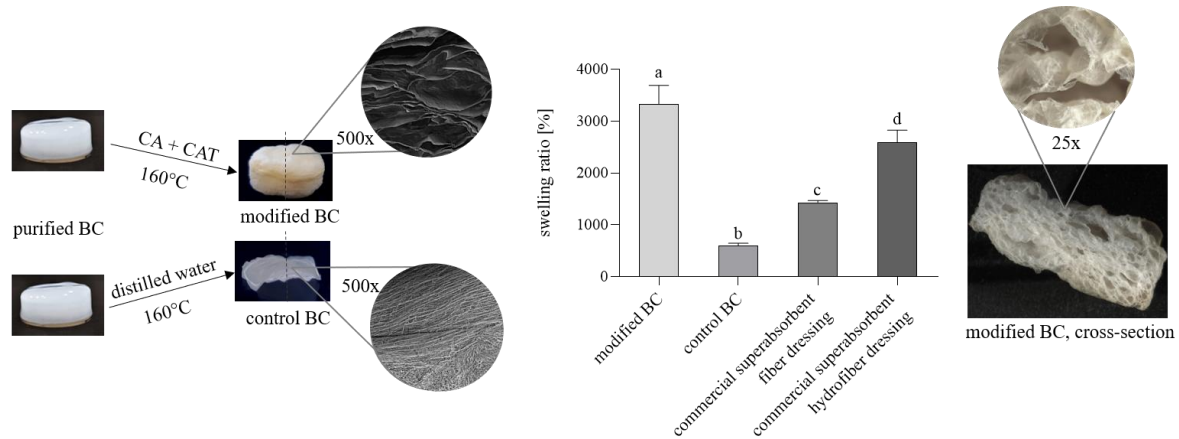

## Abstract

In this work, we present novel *ex situ* modification of bacterial cellulose (BC) polymer, that significantly improves its ability to absorb water after drying. The method involves a single inexpensive and easy-to-perform process of BC crosslinking, using citric acid along with catalysts, such as disodium phosphate, sodium bicarbonate, ammonia or their mixtures. In particular, the mixture of disodium phosphate and sodium bicarbonate was the most promising, yielding significantly greater water capacity (over 5 times higher as compared to the unmodified BC) and slower water release (over 6 times as compared to the unmodified BC). Further, our optimized crosslinked BC had over 1.5x higher water capacity than modern commercial dressings dedicated to highly exuding wounds, while exhibiting no cytotoxic effects against fibroblast cell line L929 *in vitro*. Therefore, our novel BC biomaterial may find application in super-absorbent dressings, designed for chronic wounds with imbalanced moisture level.

**Keywords:** bacterial cellulose; catalyst; crosslinking; biopolymer; water related properties, wound dressing

## Abbreviations

BC – bacterial cellulose; CAT – catalyst; CA – citric acid; M1 – modification with disodium phosphate as a catalyst (CAT); M2 – modification with sodium bicarbonate as a CAT; M3 – modification with mixture of disodium phosphate and sodium bicarbonate in the ratio 1:1 as a CAT; M4 – modification with ammonia as a CAT; M5 – modification with disodium phosphate and ammonia in the ratio 1:1 as a CAT; M6 – modification with sodium bicarbonate and ammonia in the ratio 1:1 as a CAT; M7 – modification with sodium hypophosphite as a CAT; SHP – sodium hypophosphite; SR – swelling ratio; WHC – water holding capacity; WPG – weight percent gain.

## 1. Introduction

A wide spectrum of health issues, frequently referred to as “lifestyle diseases” pose an increasing threat to modern western societies, due to their serious health complications [1]. In particular, chronic wounds are among the most persistent and serious, because they do not follow the natural trajectory of healing and, if infected, threaten the life of the patient [2]. Due to their persistence, chronic wound treatment is a significant burden for patients, their families, and health-care professionals, as well as healthcare systems in general [3]. Therefore, prevention and treatment of chronic wounds is one of the most important challenges of contemporary medicine. To date, a number of approaches to managing chronic wounds have been developed, including T.I.M.E. (Tissue, Infection, Moisture, Epithelialization), B.B.W.C. (Biofilm-Based Wound Care), and W.A.R. (Wounds at Risk) [4,5,6]. Although these strategies address the process of wound healing from different angles, they share a common denominator: maintenance of proper moisture level. In western medicine, keeping wounds dry was the conventional wisdom until landmark work by George Winter in 1962, who unquestionably demonstrated that moist wounds heal better than dry ones [7]. Winter’s paper became the basis for the moist wound-healing concept, which is generally accepted and has been further developed ever since.

The intrinsic moisture of a wound is provided by fluid referred to as the exudate [8]. In acute wounds, exudate accelerates the healing process, while in chronic wounds over- or under-production of exudate can have the opposite effect. Therefore, maintenance of the proper amount of exudate in chronic wounds is crucial for healing [9].

Additionally, to provide the appropriate healing conditions, the wound itself should be protected from microbial contamination and other external factors. Presently, there is a vast spectrum of modern dressings dedicated to protecting dry, low-exuding or highly exuding wounds [10-13]. Nonetheless, there is still an ongoing search for a dressing material that would yield quick closure of chronic wounds regardless of type and amount of exudate.

One of the candidates for such an ideal dressing material is bacterial cellulose (BC). This polymer is biosynthesized primarily by acetic acid bacteria [14], of which Gram-negative *Komagataeibacter xylinus* is the most effective producer [15]. The high purity, crystallinity and density, binding capacity, shape, and water retention [16-18] of BC has drawn extensive interest of research teams from all over the world. This is reflected by the rapidly increasing number of scientific reports on BC [19], particularly over the past 15 years, investigating its wide range of potential applications in many branches of industry [20]. In the biomedical field, this multifaceted material has already been used, among others, in drug-delivery carriers [21] and in wound dressings for patients with extensive burns [16]. These applications are possible thanks to the structure of BC, consisting of thin, loosely arranged fibrils, separated by “empty” spaces [22]. This affects the liquid capacity of BC, which depends primarily on fibril arrangement, surface area, and porosity. Overall, the more space is available between the BC fibrils, the more liquid penetrates and adsorbs into the material. It has been estimated that approx. 97-98% of total BC weight consists of water [23,24].

However, from the point of view of industry, keeping materials dry during storage is important for several obvious reasons, including prolonging the product’s expiration date and microbiological safety. While BC can be subjected to dehydration, the evaporation of water from the interfibrillar spaces causes the structure of BC to collapse [22,25]. This irreversible process deprives BC of its most unique properties. After dehydration, the three-dimensional polymer network is unable to regenerate and its ability to re-swell and to absorb liquid is significantly reduced, as compared to never-dried cellulose [26,27]. Therefore, dried BC is less useful within the scope of biomedical applications [22,28]. For this reason, the several *ex situ* modifications have been proposed to counteract the disadvantageous consequences of BC dehydration, for example the production of BC-fibrin or BC-gelatin composites, decreasing BC crystallinity, or freeze drying [28-32]. Crosslinking is another type of *ex situ* process, relying on the chemical modification of the biopolymer and resulting in improvement of its physical properties [33,34]. Crosslinking reactions have been used to modify many biopolymers; however, to date, with the exception of single scientific publication by Meftahi et al. [35], there are no reports of using this method to modify cellulose produced by

microorganisms. In their work, Meftahi et al. reported that the use of citric acid (CA) as crosslinking reagent, with sodium hypophosphite (SHP) catalyst (CAT), resulted in significantly enhanced (up to 3 times) levels of re-hydration of previously dried BC. While promising, the use of SHP as the catalyst is problematic, due to thermal SHP decomposition during crosslinking, which results in the formation of phosphine, a highly toxic and extremely flammable gas. Further, SHP itself can have a negative environmental impact, because leached hydrogen phosphide compounds can contaminate surface waters [36].

In the present work, our primary goal was to obtain dry BC, displaying very high water-related parameters, such that it could be used as a super-absorbent dressing for chronic wounds. Towards this aim, we crosslinked BC with CA and tested a range of compounds as catalysts, the majority of which have never been used for this purpose. Our secondary goal was the optimization of the crosslinking reaction, with regard to its cost-effectiveness and ecological safety.

## **2. Materials and methods**

### ***2.1. Bacterial cellulose synthesis and purification***

To obtain BC in a form of pellicles of consistent shape and diameter, the cellulose-producing *Komagataeibacter xylinus* strain (American Type Culture Collection – ATCC 53524) was cultured in 50 mL plastic tubes (Becton Dickinson and Company, USA) under stationary conditions using Hestrin-Schramm (H-S) culture medium, over 7 days at 28 °C. Obtained BC samples were purified from bacteria and culture medium components using 0.1 M sodium hydroxide solution at 80°C for 90 min, followed by rinsing with distilled water until the pH was neutral. The diameter of the obtained BC pellicles was 2.5 cm, the average thickness was 0.9 cm and the average weight was 4.5 g.

### ***2.2. Crosslinking procedure***

The crosslinking reaction was carried out using aqueous solutions of CA and different CATs. Six substances were used as CATs: disodium phosphate (later referred to as CAT1), sodium bicarbonate (later referred to as CAT2), disodium phosphate and sodium bicarbonate (1:1 mass ratio, later referred to as CAT3), ammonia (later referred to as CAT4), disodium phosphate and ammonia (1:1 mass ratio, later referred to as CAT5), sodium bicarbonate and ammonia (1:1 mass ratio, later referred to as the CAT6). Additionally, sodium hypophosphite (later referred to as CAT7) was used as a reference, because it is well described in the literature related to crosslinking of plant and also bacterial cellulose [35-38].

The crosslinking procedure consisted of four stages: *i*) impregnation of BC with CA and CAT for 24 h at 28°C, *ii*) incubation at high temperature to induce the crosslinking reaction, *iii*) purification with distilled water to remove unbound CA molecules and CATs, *iv*) drying at room temperature (**Fig. 1**).

The BC samples obtained as a result of aforementioned modifications were referred as M1-M7, depending on the CAT used (CAT1-CAT7, respectively). As a control, BC treated with just water, without CA or CAT, was used (later referred to as C).

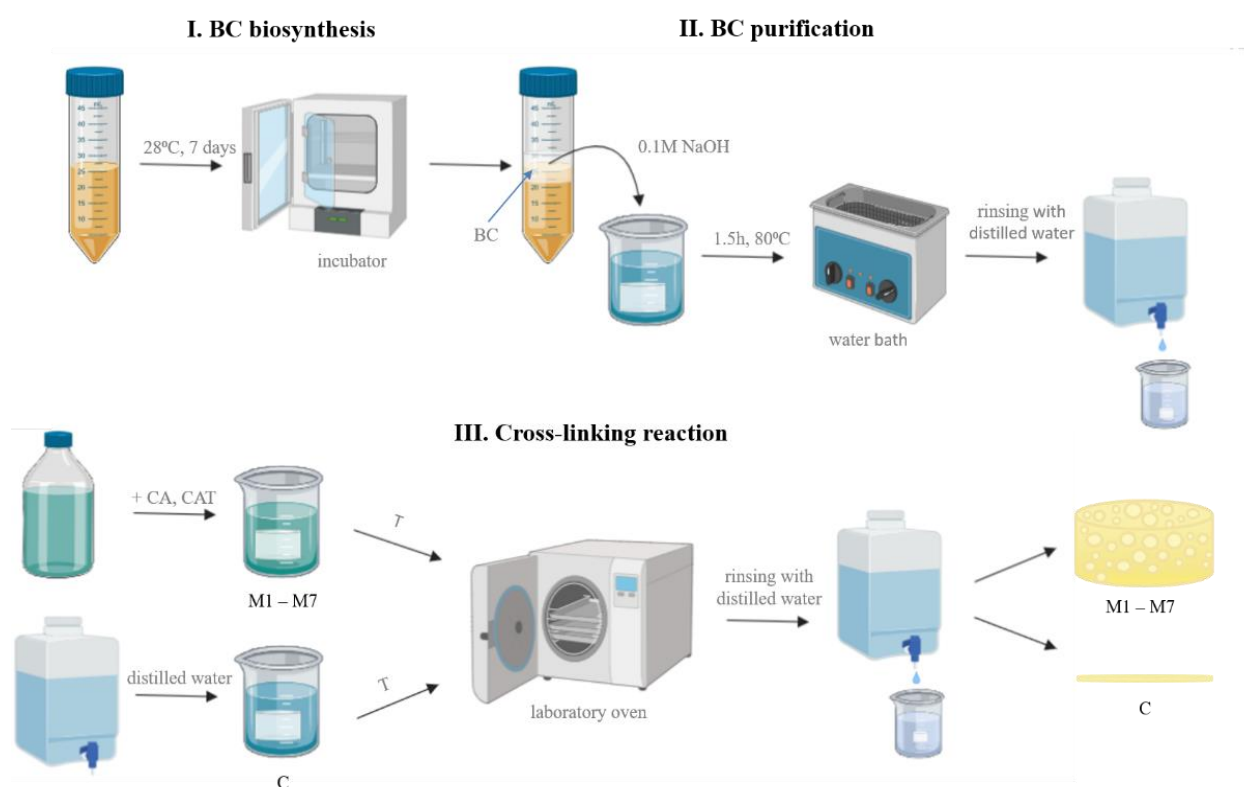

**Fig. 1.** BC modification procedure (created with BioRender.com).

### 2.3. Optimization of the BC crosslinking reactions

The first parameters to be optimized were the concentrations of CA and CATs. The following concentrations (m/v) were tested: CA – 30%, 20%, 10%, 5%; CAT – 15%, 10%, 5%, 2.5%. The initial CA to CAT mass ratio (2:1) and reaction temperature (160 °C) were selected based on the previously published conditions [38-40]. The reaction was carried out until BC was completely dehydrated, that is until the weight of the sample stabilized.

Following the determination of the optimal concentrations of CA and CATs, we optimized the remaining parameters: CA to CAT mass ratio, reaction time and temperature. The following mass ratios between defined optimal concentrations of CA and CAT were tested:

1:1, 1.5:1, 2:1, 2.5:1, 3:1, 1:2. The role of crosslinking reaction temperature was assessed in the range between 120 and 180 °C and the following reaction times: 5, 15, 30, 60, 75 and 90 min.

#### ***2.4. Evaluation of the crosslinking efficiency under optimal conditions using various catalysts***

The BC crosslinking efficiency under optimal, defined reaction conditions was assessed as the BC weight percent gain (WPG%) compared to the weight of unmodified BC (control) and calculated according to the following formula [41]:

$$WPG [\%] = \frac{W_m - W_u}{W_u} * 100\%$$

where:  $W_m$  is the dry weight of modified BC, and  $W_u$  is the dry weight of unmodified BC.

#### ***2.5. Evaluation of the properties of BC crosslinked under optimal conditions using various catalysts***

##### ***2.5.1. Analysis of the BC microstructure – scanning electron microscopy (SEM)***

Modified BC samples were fixed in glutaraldehyde (POCH, Poland) for 0.5 h and washed in the following concentrations of ethanol: 10%, 25%, 50%, 60%, 70%, 80%, 90%, 100%, respectively (POCH), 5 min at each concentration. Subsequently, the BC was subjected to sputtering with Au/Pd (60:40) using EM ACE600, Leica sputter (Leica Microsystems, Wetzlar, Germany). The sputtered samples were examined using a scanning electron microscope (SEM, Auriga 60, Zeiss, Oberkochen, Germany).

##### ***2.5.2. Elemental analysis of BC surface – energy-dispersive X-ray spectroscopy (EDX)***

Samples were placed on aluminum tables, sputtered with gold (20 nm) using EM ACE600, Leica sputter (Leica Microsystems, Wetzlar, Germany), and placed in the scanning electron microscope chamber (Auriga 60, Zeiss, Oberkochen, Germany). An X-ray microanalysis (EDX) was carried out using an EDX Oxford detector (Oxford Instruments, Abingdon, United Kingdom). The working distance was 5 mm and the voltage 20 kV. For characterization of sample composition, the AZtec system (Oxford Instruments, Abingdon, United Kingdom) was used.

##### ***2.5.3. Determination of chemical composition of the BC – attenuated total reflectance Fourier transform infrared spectral studies (ATR-FTIR)***

The assessment of the chemical composition of the BC samples was performed using a Bruker Alpha FTIR spectrometer with an ATR adapter. Spectra (32 scans) were collected over wavenumber range of 4000-400  $\text{cm}^{-1}$  with a resolution of 4  $\text{cm}^{-1}$ . The obtained ATR-FTIR spectra were analyzed using the Spectragryph 1.2 software. Additionally, the 2DShige© v1.3 program [42,43] was used to perform 2D correlation analysis. 2D correlation spectra were visualized with use OriginPro 8 software.

The chemometric principal component analysis (PCA) analysis of all spectra was performed with using R software and the *FactoMineR* and *Factorextra* packages [44] via RStudio software. Prior to the analysis, the spectra in the of range 1850  $\text{cm}^{-1}$  to 850  $\text{cm}^{-1}$  were normalized to the peak area at 1200  $\text{cm}^{-1}$ . The areas of integrated peaks were used as input data for PCA analysis.

#### 2.5.4. Determination of water swelling ratio

To determine the swelling ratio (SR), BC pellicles were first dried at room temperature to completely remove water content. The dry BC samples were then immersed in distilled water and weighed – first after 1 min, and then every 10 min up to 60 min. After 60 min, the BC samples were left in water and their weight was measured after 24 h. The percentage of water absorption was calculated using the following formula [45]:

$$SR [\%] = \frac{(W_w - W_d)}{W_d} * 100\%$$

where,  $W_w$  is the weight of the swollen BC and  $W_d$  is the dry weight of the sample.

#### 2.5.5. Determination of water holding capacity

Dry BC pellicles were weighted, immersed in distilled water for 24 h to obtain maximum absorption level, and then weighed again. The ability to hold water was determined using two methods. First, BC samples were arranged on cell strainers placed in 50 mL tubes, centrifuged (5804R, Eppendorf, Germany) at 200 g, and then weighted every 10 min for 100 min. In the other method, BC samples were placed in an incubator at 37 °C and weighted every 10 min for 240 min. Water holding capacity (WHC) was calculated using the following formula:

$$WHC[\%] = \frac{W_{rw}}{W_w - W_d} * 100\%$$

where,  $W_{rw}$  is the weight of water retained in BC during drying/centrifuging,  $W_w$  is the initial weight of wet BC, and  $W_d$  is the dry weight of the sample.



### 2.5.6. Determination of the BC density

The density of the BC samples was determined using hydrostatic balance (XA 52/Y, Radwag, Poland) in methanol as a standard liquid. The weight of samples was measured at room temperature in air as well as in methanol. The sample density was determined using the formula [46]:

$$\rho = \frac{W_d}{W_d - W_m} * \rho_{methanol}$$

where,  $W_d$  is the weight of the dry sample in the air,  $W_m$  is the weight of the sample in methanol, and  $\rho_{methanol}$  is the density of methanol.

## 2.6. Determination of the cytotoxicity of modified BC

### 2.6.1. Direct contact assay

All cell culture reagents and cell lines were purchased from Sigma-Aldrich (Poznań, Poland). For direct contact assay,  $1 \times 10^4$  L929 cells (mouse fibroblasts) were seeded per well in a 96 well plate. Following 24 h of culture in Dulbecco's Modified Eagle Medium (DMEM) containing 10% fetal bovine serum (FBS), 2 mM L glutamine, 100 U/mL penicillin, and 100  $\mu$ g/mL streptomycin (hereafter referred to as “complete growth media”) in an incubator (5% CO<sub>2</sub>, 37°C), the cells were assessed to be ~50% confluent, the media was aspirated, and modified BC pellicles were placed on top of the cell layer. CellCrown tissue culture inserts were then placed on top of the discs to prevent them from floating and media was replaced. Note: Each disc was pretreated by soaking in 2 mL of complete growth medium for 1 h. As a sham control, CellCrown tissue culture insert was placed directly into the well. After another 24 h of culture in 5% CO<sub>2</sub> at 37°C, wells were examined using inverted light microscope and then resazurin stock (0.15 mg/mL) was added to each well (1:6 dilution) [47]. After 4 h of incubation the viability was assessed using fluorescent plate reader (Synergy HTX, Biotek, USA) at wavelengths of 540 nm excitation and 590 nm emission. Complete growth media in an empty well was used as a blank. The results were expressed as percent of cell viability, and calculated by the following formula [48]:

$$\% \text{ of cell viability} = \left( \frac{FL_s - FL_b}{FL_c - FL_b} \right) \times 100$$

where FL is the fluorescence intensity (arbitrary units) and indexes  $s$ ,  $b$ , and  $c$  refer to sample, blank, and control, respectively.

### 2.6.2. *Extract assay*

Extracts of crosslinked BC were prepared according to the ISO 10993 norms: Biological evaluation of medical devices; Part 5: Tests for in vitro cytotoxicity; Part 12: Biological evaluation of medical devices, sample preparation and reference materials (ISO 10993-5:2009 and ISO/IEC 17025:2005). Briefly, for each tested material 8 BC pellicles were placed in a 24 well plate well and covered with 1.5 mL of complete growth medium. As a sham control, 1.5 mL of media was pipetted into an empty well. The plate was then placed into 37°C CO<sub>2</sub> incubator for 24 h of extraction.

Simultaneously,  $1 \times 10^4$  L929 cells were seeded per well in a 96 well plate. Following 24 h of culture in 5% CO<sub>2</sub> at 37°C, the cells were assessed to be ~50% confluent, the media was aspirated and replaced with 100 µL of extract – 5 technical replicates were performed per sample. After another 24 h of culture, cells were examined using inverted light microscope and then cell viability was assessed as described above.

### 2.7. *Confocal microscopy (CM) analysis of fibroblast viability on BC pellicles*

L929 fibroblasts were cultured on BC samples for 5 days, followed by fixation in 3.7% formaldehyde solution and staining with SYTO-9 and Propidium Iodide (PI) dyes (a mix of both from ThermoFisher) to visualize DNA in live and dead cells, respectively. The samples were then imaged using an upright Leica SP8 confocal microscope (Leica Microsystems). Stacks of confocal 8-bit images with a voxel size of 0.465 x 0.465 x 1.5 µm were acquired using a dry 20× objective (NA 0.75) with the pinhole was set to 1 AU. SYTO-9 was excited with 488 nm laser line and 492-526 nm emission range was collected, while PI fluorescence was excited with 552 nm laser line and 561-611 nm emission range was recorded. The presence of cellulose surface below cultured cells was confirmed in reflection mode using a 638 nm laser line. The acquisition was performed in sequential mode. Three-dimensional rendering was performed in Imaris software (Bitplane).

### 2.8. *Statistical analysis*

Data are shown as means ± standard errors of the means (SEM) obtained from at least three different measurements (plus technical repetitions). Statistical differences between different BC samples were determined by one-way analysis of variance (ANOVA) and Tukey's post hoc test. All analyses were considered statistically significant when the P value was less than 0.05. Statistical tests were conducted using Statistica 9.0 (StatSoft, Poland).

### 3. Results and Discussion

There is an obvious need for a super-absorbent material dedicated to chronic wound management, as can be seen from the vast number of commercially available dressings. Besides the ability to maintain proper level of exudate, an ideal dressing should be non-toxic, compatible with other therapeutic measures, elastic, resistant to shear, cost-effective, and environmentally friendly [49]. Dressings made of BC meet, to some extent, all of these demands. However, there remains a need to improve their cost-effectiveness and, crucially, ability to absorb fluids after dehydration.

In terms of cost-effectiveness of BC dressing production, the primary focus has been on using various side-products from the food industry, instead of dedicated microbiological media, for cultivating cellulose-producing bacteria. Recently, Revin et al. [50] presented promising results following this strategy. However, with regard to preserving BC water-related properties after drying process, there has been much less progress. The production of BC by *K. xylinus* is a complex phenomenon, with various interlocked genetic, biochemical, chemical, and physical mechanisms having an impact on the final properties of the BC [51]. Therefore, *in situ* modifications are of low potential for this purpose, given that the end product, i.e. the BC dressing, should display the same applicative parameters, regardless of production batch [52]. For this reason, *ex situ* modifications, which do not deal with live microorganisms, but with purified BC matrix, hold greater applicative potential [53].

Crosslinking is one such *ex situ* modification method, typically obtained by linking at least two hydroxyl groups of single cellulose molecule or two or more hydroxyl groups of adjacent cellulose molecules [54]. As a result, the material becomes stiffer and preserves its three-dimensional structure.

Many substances have been used as polymer crosslinkers (bridging agents). The most well-known and effective examples include formaldehyde and urea-formaldehyde products [55,56]. Unfortunately, their use is not considered safe [57]. Therefore, other substances are being sought to perform effective and safe crosslinking. For example, alkanopolycarboxylic acids are capable of crosslinking cellulose fibers by forming ester bonds with cellulose hydroxyl groups [58-60]. Alternately, dialdehydes (e.g. glyoxal) are able to crosslink cellulose hydroxyl groups with acetal bonds [61-64]. However, according to CA 2028977C patent, saturated polycarboxylic acids with 2-9 carbon atoms, containing at least three carboxyl groups per molecule, are preferred crosslinkers, because they yield highly absorbent materials for medical applications [65]. One of such acid is citric acid (CA), which is particularly promising not only because of its safety and non-toxicity, but also because of the stable crosslinking bonds it forms

with cellulose. Additionally, and importantly, CA is easily accessible and inexpensive, making this reagent commercially attractive. As a result, CA has already been used in a number of biomedical studies involving crosslinking of hydrogels, plant cellulosic materials, and bio-composites [66-68].

In order to accelerate and to increase the effectiveness of crosslinking reaction, a number of catalysts (CATs) has been used. Example compounds include zinc chloride, zinc nitrate, ammonium chloride, ammonium sulfate, magnesium chloride, magnesium acetate, aluminum sulfate, sodium hypophosphite, sodium phosphate, and mixtures of these substances [69].

In the present research, we applied the following compounds and their mixtures as catalysts: disodium phosphate (CAT1); sodium bicarbonate (CAT2); mixture of disodium phosphate and sodium bicarbonate (1:1 mass ratio, CAT3); ammonia (CAT4); disodium phosphate and ammonia (1:1 mass ratio, CAT5); sodium bicarbonate and ammonia (1:1 mass ratio, CAT6); sodium hypophosphite (CAT7). Importantly, none of these catalysts or their mixtures, with the exception of sodium hypophosphite, has been used for crosslinking of BC and only disodium phosphate was previously used as bridging agent in general. The specific rationale behind our choice of potential CATs was the fact that their decomposition at high temperatures is associated with the release of large amount of gases. We hypothesized that released gas would fill the spaces between the crosslinked fibrils and BC layers, preventing them from collapsing during dehydration. Further, we assumed that the released gases could form new cavities within the BC matrix, further increasing water sorption capacity. Finally, in order to facilitate future translation and commercialization, we also assessed the specific CATs from the point of view of their potential impact on the environment, cytotoxicity, and cost-efficiency.

### ***3.1. Optimization and determination of the BC crosslinking parameters***

The primary aim of this work was to obtain biomaterial with super sorption properties. Therefore, the water-swelling ratio (SR [%]) was used as the primary parameter to assess the effectiveness of each BC modification. Additionally, BC crosslinking efficiency, calculated as a weight gain of crosslinked BC in comparison to unmodified BC, was also determined, because it provides important insight into the chemical and physical phenomena occurring during each specific crosslinking reaction.

The SR [%] values for BC samples modified using different CATs under the same reaction conditions displayed a comparable trend. The SR [%] results for the most effective M3 modification are presented in **Fig. 2**, while the entire data set of the results from the optimization process tabulated in the Supplementary material (**Tab. S1. – Tab. S9.**)

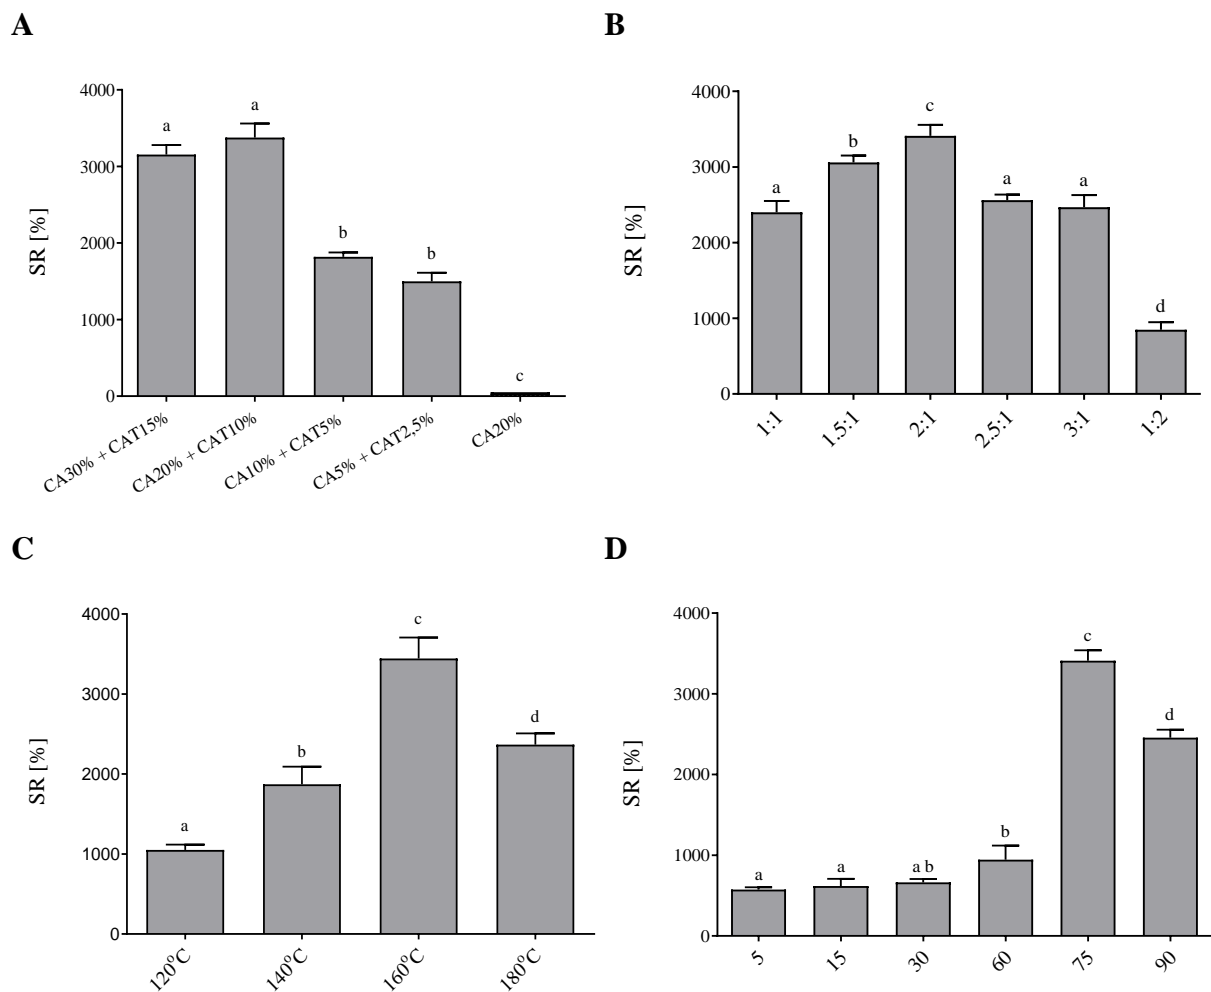

**Fig. 2.** Swelling ratio (SR [%]) measured after 24 h, depending on the parameters used during optimization of BC crosslinking with M3 (disodium phosphate and sodium bicarbonate 1:1 mixture as a catalyst); **A)** different percentage of CA and CAT; **B)** different CA:CAT mass ratio; **C)** different reaction temperature; **D)** different reaction time.

Data are presented as mean  $\pm$  standard error of the mean (SEM); values with different letters are significantly different ( $p < 0.05$ ): a, b, c, d – statistically significant differences between the analyzed parameters.

### 3.1.1. Concentration of citric acid and catalysts

Solutions consisting of 20% CA and 10% CAT, as well as 30% CA and 15% CAT – regardless CAT used – yielded BC pellicles with significantly higher values of SR [%], as compared to lower concentrations of both compounds (**Fig. 2A, Tab. S1, Tab. S2**). Further, SR [%] did not differ significantly between 20% CA + 10% CAT and 30% CA + 15% CAT solutions. The highest SR [%] ( $3377.09 \pm 184.43$ ) was obtained for the M3. With decreasing

CA and CAT concentration, below 20% CA and 10% CAT, a gradual decrease of SR [%] was observed. Thus, taking into account the economic aspect, for the further optimization stages the lower, but still highly effective, concentration of CA and CAT (CA20% + CAT10%) was chosen. These results are consistent with the results of Meftahi et al. [35], who reported the same concentration of CA and CAT (in their case, SHP) as the yielding the highest SR [%] values.

### 3.1.2. *Mass ratio of citric acid to catalyst*

BC samples modified using 20% CA + 10% CATs 1-5 and CAT7 reached the highest values of SR [%] at a CA:CAT mass ratio of 2:1 (**Fig. 2B, Tab. S3, Tab. S4**). The highest values of SR [%] were obtained for M3 ( $3410.72 \pm 146.97$ ) and the SR [%] values were significantly higher, as compared to the other ratio variants. When CAT6 (mixture of sodium bicarbonate and ammonia) was used, the values of SR [%] obtained did not significantly differ between mass ratios 2:1 and 1.5:1. For the case of the M7, although the SR [%] reached the highest values at mass ratio 2:1, the further increase did not result in statistically significant differences (likewise between 1.5:1, 2.5:1 and 3:1). As a result, the 2:1 (CA:CAT) ratio was chosen for the further steps of the optimization. Additionally, our results are consistent with the CA:SHP ratio previously reported by Reddy & Yang [70].

### 3.1.3. *Crosslinking reaction temperature*

Regardless of the CAT used (**Fig. 2C, Tab. S5, Tab. S6**) the highest SR [%] was obtained at a temperature of 160 °C. Overall, increasing the temperature up to 160 °C correlated with increase of SR [%] in all BC samples, but when the temperature exceeded 160°C, the SR [%] decreased.

### 3.1.4. *Duration of crosslinking reaction*

Once again, regardless of the CAT used, the highest SR [%] values were obtained after 75 min of crosslinking reaction (**Fig. 2D, Tab. S7, Tab. S8**). However, it is important to note that the duration of crosslinking must be adjusted to the weight of the sample – the heavier it is, the longer time of crosslinking is required (data not shown). Here, the BC samples had an average weight of 4.5 g. Compared to the work of Meftahi et al. [35], where BC samples were crosslinked at 160°C for just 5 min, the optimal crosslinking duration determined here was significantly longer, however the precise size and weight of BC samples used in that work were not clearly specified.

### 3.2. Morphological characteristics

#### 3.2.1. Macromorphological characteristics of modified BC

Macromorphological examination demonstrated that dried, modified BCs, contrary to the unmodified samples, possess an arranged, multilayer structure regardless of CAT used (**Fig. 3, Fig. 4, Fig. S3**).

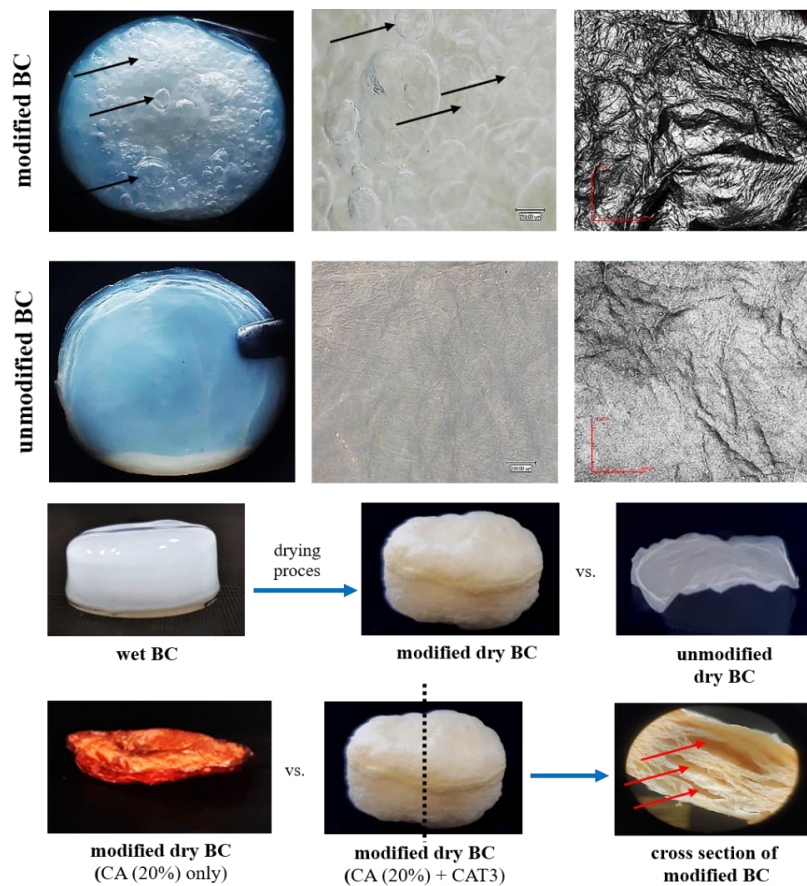

**Fig. 3.** The morphological differences in modified and unmodified BC (variant M3 with disodium phosphate and sodium bicarbonate as a catalyst). Black arrows indicate air bubbles on the surface of the samples, whereas red arrows indicate spaces between BC layers.

This multilayer spatial arrangement of BC is directly related to the biological and physical processes of its polymer synthesis [14]. Cellulose fibrils secreted by the bacterial cells into the extracellular space form a thin layer on the surface of the medium [71]. Over a time, a new cellulose layer appears on the surface, pushing the older one down and this process repeats until depletion of oxygen and nutrients in medium. The fact we observed multilayers in our crosslinked BC samples confirms that the process successfully prevents the collapse of the 3D structure during drying.

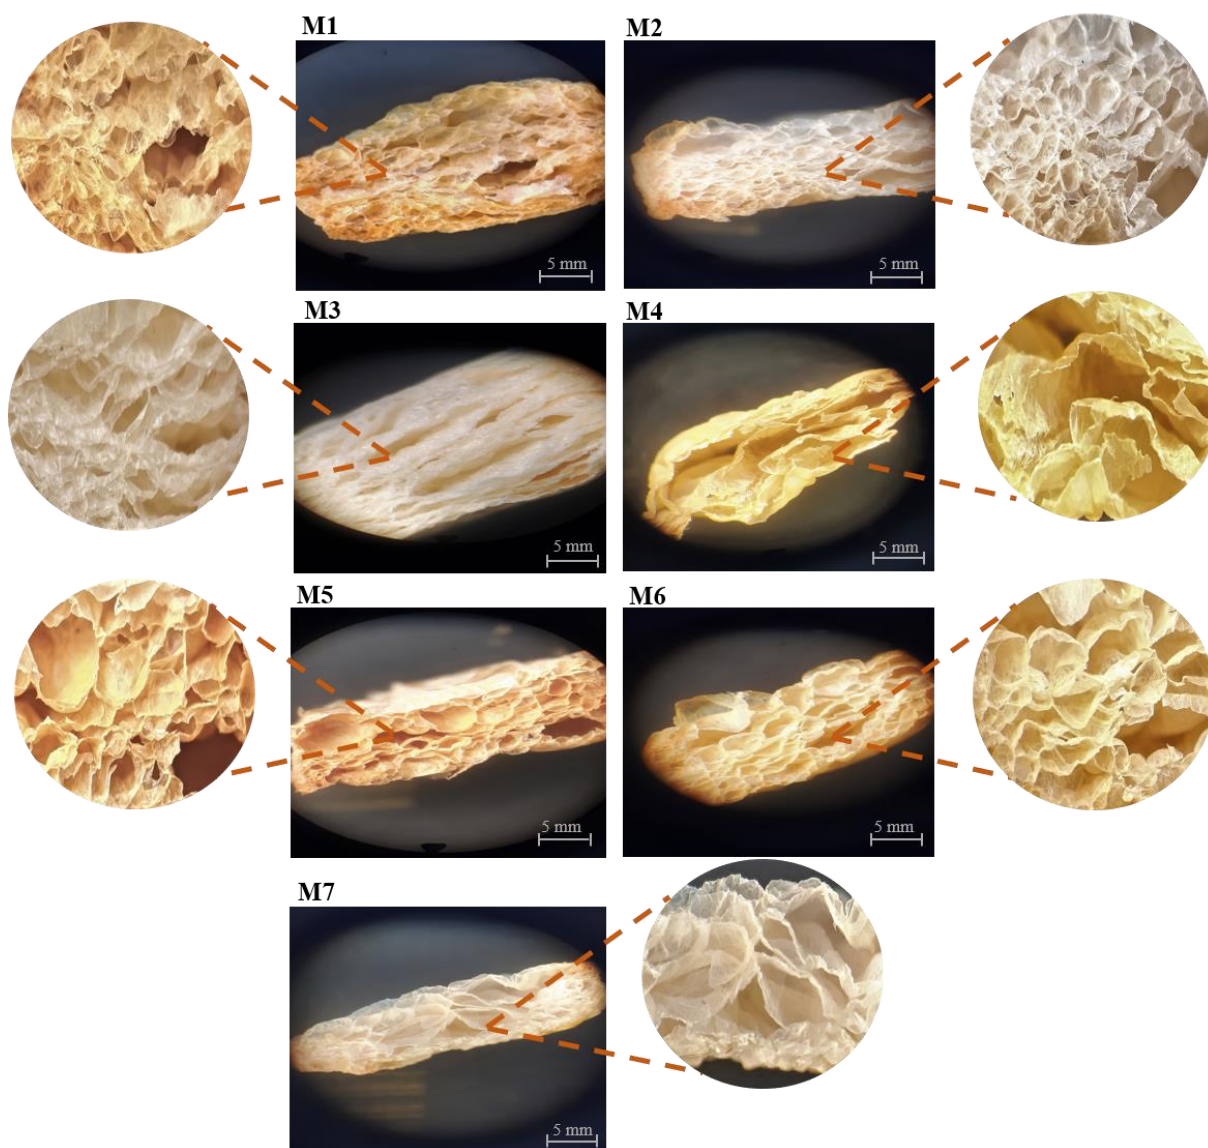

**Fig. 4.** Cross sections of modified BC samples visualized by stereoscopic microscope (magnification 5x and 25x, pictures in the center and on the edges of the figure, respectively).

Cross sections of the dried modified BC samples revealed the presence of empty spaces between the layers in all of the modified BC pellicles, but not in the case of unmodified BCs (**Fig. 3, Fig. 4, Fig. S3**). This provides strong evidence in support of our hypothesis that gas bubble formation – carbon dioxide, in the case of the sodium bicarbonate containing CAT3 – occurs within the BC structure during crosslinking reaction with use of the tested thermo-sensitive catalysts. Also, it is worth mentioning that the surface of the modified BC was also heavily folded, in contrast to the relatively smooth surface of unmodified BC (**Fig. 3, Fig. S1, Fig. S2**). Thus, the results of macromorphological examination help explain why modified BC



samples, particularly those crosslinked with addition of CAT3, displayed significantly higher SR [%] than unmodified BC.

### ***3.3. Micromorphological characteristics of modified BC***

In order to assess the nanoscale architecture of crosslinked BC, we used SEM imaging. Overall, SEM images of the surfaces of BC pellicles demonstrated that the nano-porosity and BC layer structure were preserved in all of the studied reaction conditions. Fibril thickness and average pore diameter were comparable between all modified BC pellicles (regardless of CAT used) and control BC samples (**Fig. S4-7**). All of the modified BC samples showed a much higher degree of surface folding, as compared to the unmodified control BC (**Fig. S1, Fig. S2**), but no specific pattern of surface folding with different CATs was observed. In contrast, the SEM imaging of BC cross sections showed that morphology of stratification, as well as the formation of spaces between layers was CAT-specific (**Fig. 5**). In all modified BC pellicles, multiple spaces appeared as a result of delamination or blistering. However, we did not observe such stratification patterns in the case of control BC, which was characterized by a typical homogeneous structure throughout the entire section.

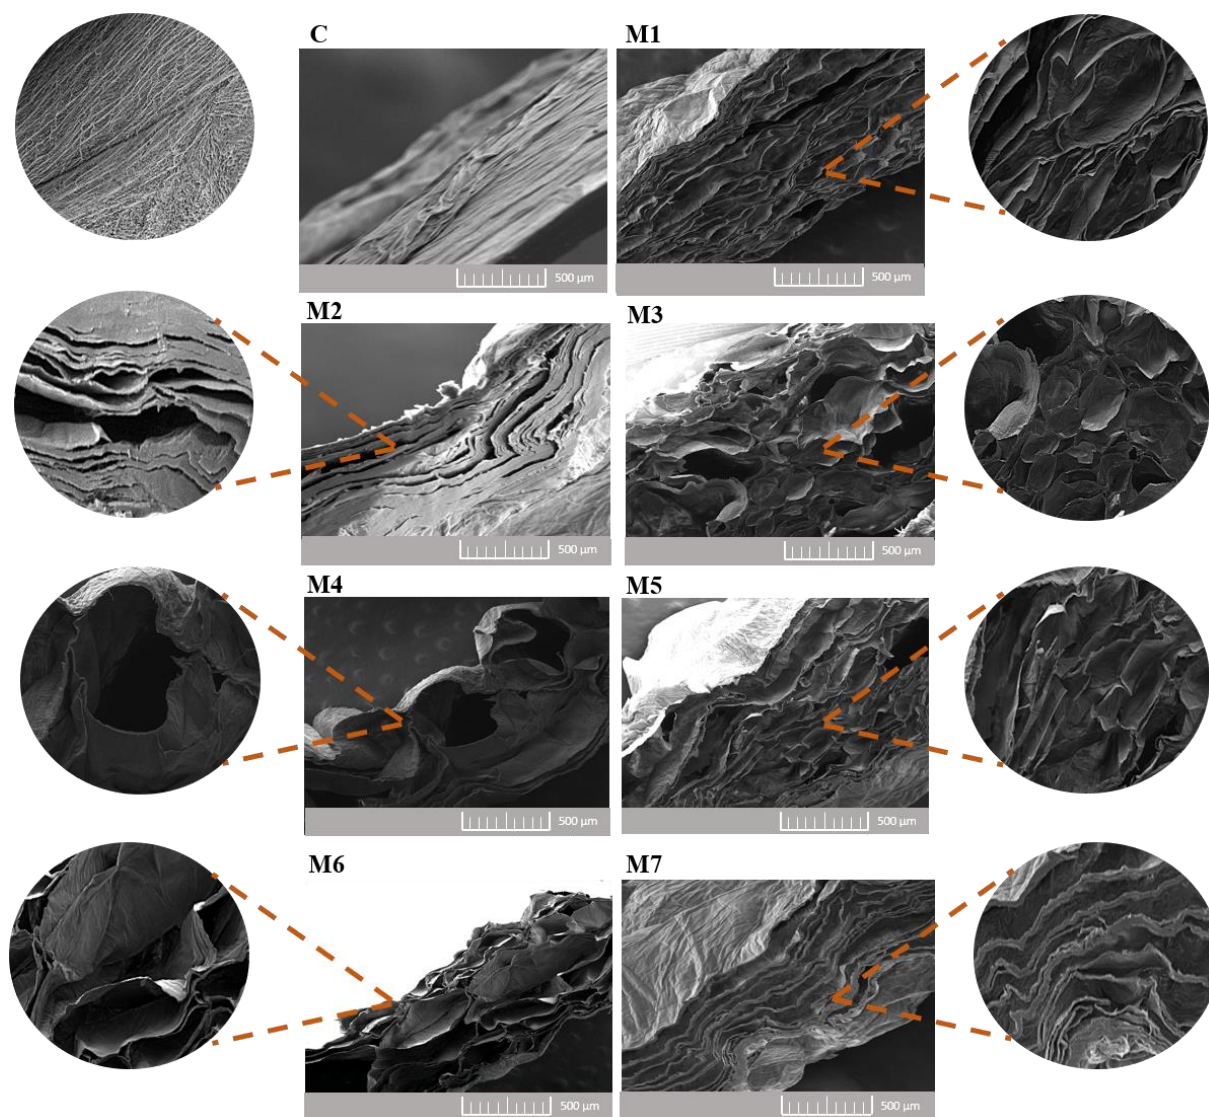

**Fig. 5.** Cross sections of BC pellicles visualized by scanning electron microscopy at 500x and 2000x magnification for images in the center and on the edges of the figure, respectively.

For the case of M1, SEM imaging of cross sections demonstrated regular corrugations of the matrix, the presence of numerous, but relatively small, regular bubbles (air spaces), and moderate layer stratification (**Fig. 5**). In contrast, M2 was characterized by greater degree of corrugation. Instead of the bubbles present in M1, longitudinal air spaces can be observed between the separate layers of M2. The structure of M3 resembled M1, except that the degree of folding was greater and the bubbles (visible as black spots) were larger and more deeply located. Meanwhile, M4 microstructure was characterized by a very high degree of folding and the presence of very large air spaces taking form of large, torn blisters. Further, the cellulose structure in M4 was also heavily altered. The structure of M5 resembled, to some extent M1 and M3; however, deep air channels instead of bubbles were observed. Cross sections of M6

were characterized by corrugated structure and numerous, very large, elongated air spaces due to their presence, the delamination was not as clearly visible as in case of M2. Finally, cross sections of M7 exhibited a greater degree of stratification, as compared to M2. Further, large air spaces, but no air bubbles, were observed between layers of this modified BC. In contrast to all of the modified BC pellicles, the control BC had no layers or blisters and was characterized by regular, compact structure, with overlapping layers of cellulose clearly visible. Thus, in the process of dehydration, the unmodified cellulose fibers flatten, undergoing irreversible deformation – this is the reason that dried, unmodified BC has significantly lower rehydration capacity.

In summary, SEM imaging revealed that crosslinking process results in two main changes in BC pellicle microstructure. First, is evident stratification, created by the air spaces between successive layers of cellulose (e.g. M2, M7). Second, is deformation caused by the presence of large, spherical or ellipsoidal air spaces (bubbles) (e.g. M4, M6). However, the most favorable SR [%] values (see **Fig. 2, Tab. S1-S9**) were obtained for BC samples where both types of BC microstructure alteration occurred simultaneously (M1, M3, M5). We conclude that the final microstructure of modified BC depends on both the amount of gas produced and on the pressure generated within the sample during drying of fibers. It may be assumed that gradual release of smaller amounts of gas leads to BC delamination, while the rapid release of larger amounts of gas, leads to the formation of larger bubbles.

Simultaneously with SEM imaging, energy-dispersive X-ray spectroscopy (EDX) analysis was performed to determine the specific elemental composition of modified and control BC surfaces (**Fig. S8, Tab. S10**). The measurements confirmed that carbon and oxygen were the main constituents of BC fibers, both in modified and unmodified samples. In the case of BC modified in the presence of CATs containing sodium salts (all the CATs except for CAT4), trace amount of sodium was also detected (0.2-0.5 w/w%). Somewhat surprisingly, nitrogen was not detected on the surface of BC modified with ammonia-based CATs (CATs 4-6). However, trace amounts of phosphorous were detected on M1, M3, and M5 samples, those that were modified with phosphorous-containing CATs (0.3-0.5 w/w%). It is worth noting, that in the case of the M7 sample (modified in the presence of sodium hypophosphite), the content of phosphorous was significantly higher (1.7 w/w%), as compared to the other aforementioned modifications.

### 3.4. Analysis of ATR-FTIR spectra

Comparison of ATR-FTIR spectra of unmodified and modified BC indicated that all of the applied modification protocols had a major impact on BC chemical structure (**Fig. 6A, Fig. S9**). The primary difference as compared to non-treated BC was the appearance of a characteristic band at  $1720\text{ cm}^{-1}$ , indicating the presence of a carbonyl group (C=O, stretching) [72] – this can be considered a fingerprint of ester bonds and unreacted carboxylic groups of CA. The highest intensity of this band was observed following M5 modification, in which the combination of ammonia hydroxide and disodium phosphate was used as catalyst, while for other the tested CATs the intensities were similar. Additionally, a second, characteristic and expected ester band appeared in all spectra of modified BC at approx.  $1248\text{ cm}^{-1}$  (C-C-O asymmetric stretching) [73]; however, its intensity did not vary between modification variants. Further, 2D-COS spectra (all modifications) also revealed that crosslinking process had a high impact on band intensities in the spectral region of  $1200\text{ cm}^{-1}$  to  $850\text{ cm}^{-1}$  (**Fig. 6A, Fig. 6D**). In this region, the spectra are primarily shaped by C-O-C stretching ether linkages and pyranose backbone rings and carbon-oxygen bonds (C-OH), indicating presence of primary alcohols [74]. The reduction in intensity of bands in this region could be also a consequence of ester bond formation between carboxyl groups of citric acid (CA) and C-OH of anhydrous glucose units in BC fibrils. The presence of negative cross-peaks in the synchronous spectrum  $1720\text{ cm}^{-1}$  vs.  $950\text{ cm}^{-1}$  also suggests the possibility of a significant influence of modification process on the crystallinity of BC [75,76].

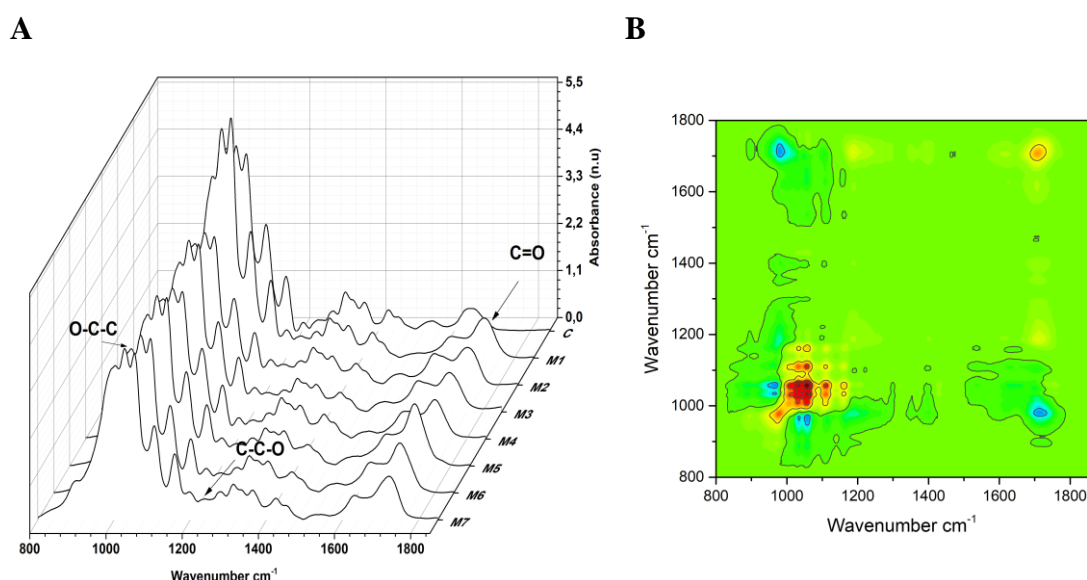

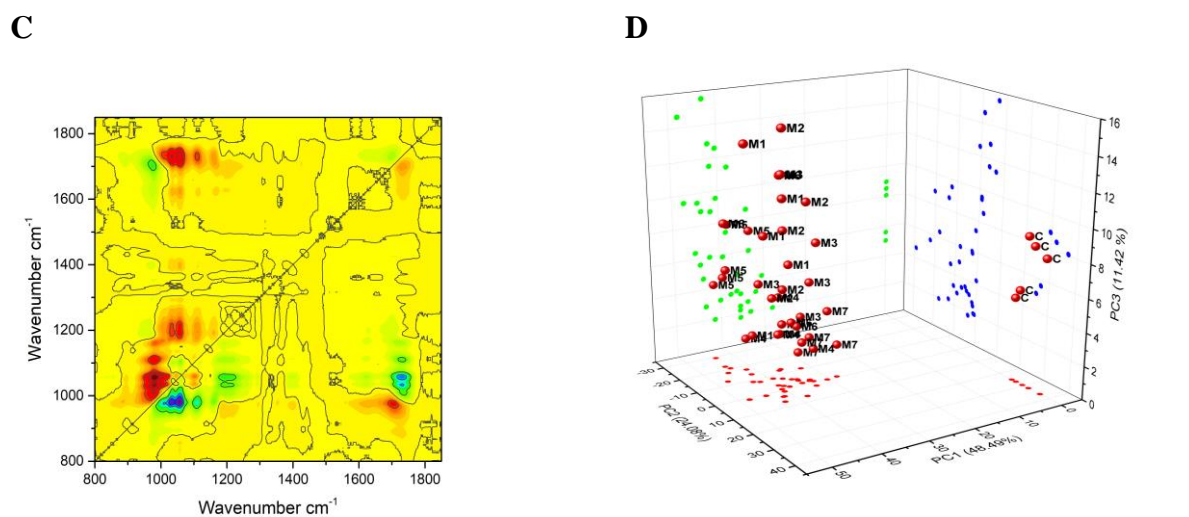

**Fig. 6.** Result of ATR-FTIR analysis of crosslinked BC. **A)** 1D spectra region from 1800  $\text{cm}^{-1}$  to 800  $\text{cm}^{-1}$  of modified BC with different CATs, **B)** 2D-COS synchronous spectra, **C)** 2D-COS asynchronous spectra, **D)** result of PCA analysis with plotted PC1, PC2 and PC3 dimensions.

Finally, the preformed PCA analysis of ATR-FTIR data confirmed successful modification of BC and showed also differences in the impact of the different types of modifications on the BC structure. From all extracted principal components, the first three account for approx. 80% of variance. In the PC1 (48.49%) dimension, the main contribution, accounting for over 80% of variance, was the result of changes at bands: 1320  $\text{cm}^{-1}$ , 1108  $\text{cm}^{-1}$ , 1277  $\text{cm}^{-1}$ , 1313  $\text{cm}^{-1}$ , 1427  $\text{cm}^{-1}$ , 1160  $\text{cm}^{-1}$ , 1248  $\text{cm}^{-1}$ , 1364  $\text{cm}^{-1}$ , 1720  $\text{cm}^{-1}$ . The changes in the first six bands influenced PC1 to the greatest degree, with almost equal contributions (above 10%). The PC2 (24.08%) dimension was determined primarily by set of bands in the spectral range from 1002  $\text{cm}^{-1}$  to 895  $\text{cm}^{-1}$ , with the band at 980  $\text{cm}^{-1}$  having the greatest influence on this dimension. The last dimension, PC3 (11.42%) was primarily determined by bands at 1002  $\text{cm}^{-1}$ , 1540  $\text{cm}^{-1}$ , 1640  $\text{cm}^{-1}$ , and 1720  $\text{cm}^{-1}$ . The 3D plot of all dimensions indicated that samples of control BC were a significant distance from samples of modified BC (**Fig. 6C**). Further, samples of M1 and M2 were in similar region of space, in contrast to M5, M6, and M7. Finally, samples from M3 and M4 occupied the regions overlapping with previously listed modification variants.

### **3.5. Water-related properties of BC samples crosslinked under optimal conditions using various CATs**

The biomedical applications of BC as a wound dressing material depend primarily on its water-related properties, including water swelling and holding capacity, as well as water

release rate. These properties depend, in turn, on pore size, pore volume, and surface area [77,78]. The high liquid absorption capacity of BC is the primary driver for its application as a wound dressing material. Its excellent swelling capabilities not only help to absorb and sequester wound exudate, but also make dressing non-adherent to the wound bed. This latter feature is of paramount importance, not only with regard to easy, painless dressing removal, but also because it prevents the destruction of fresh, fragile granulation tissue [79,80]. Further, the adsorption capacity of BC for liquids and small particles also makes it an appropriate material for impregnation with antimicrobials; therefore, it can act as a drug carrier with excellent wound healing potential [81]. As previously explained, fully swollen or completely dried BC is significantly devoid of ability to absorb fluids, including wound exudate. However, we hypothesized that following crosslinking, dried BC would have preserved nano-fibrous structure and maintained high water absorption capacity.

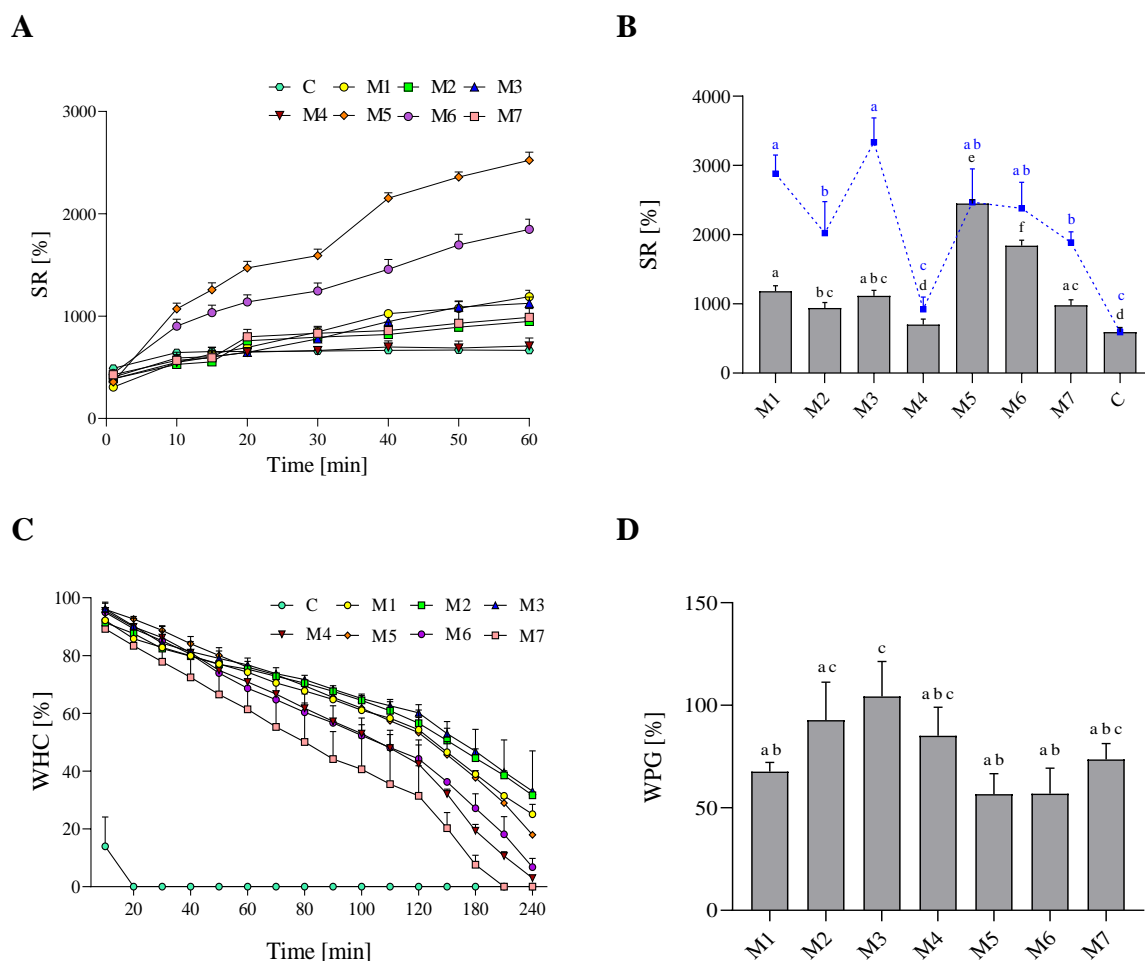

**Fig. 7.** Water-related parameters of modified and unmodified BC: **A)** SR [%] over 60 min of incubation in water; **B)** SR [%] value after 60 min of incubation (column) compared to SR [%]

after 24 h (line); **C**) WHC [%] over 60 min of incubation at 37°C, **D**) efficiency of BC crosslinking reaction (WPG [%]) in the presence of each CAT.

Data are presented as mean± standard error of the mean (SEM); values with different letters are significantly different ( $p < 0.05$ ): a, b, c, d – statistically significant differences between the analyzed parameters.

The results presented in **Fig. 7A**, **Fig. 7B**, **Tab. S11**, **Tab. S12** showed that after 60 min of incubation with water, SR [%] values for M1-M3 did not exceed twice the SR [%] value for the non-modified (control) BC. These samples were characterized by a slow, gradual increase in the SR [%] values over the entire period of 60 min and continued to absorb water up to 24 h (**Fig. 7B**). After this time, SR [%] values for samples M1-M3 were more than 3 times higher compared to the control BC, for which no increase of absorption was observed between 60 min and 24 h incubation in water. The highest values of SR [%] were obtained for M3: approx. 2 times higher after 60 min and over 5 times higher after 24 h of incubation in water, as compared to control BC. For M4 after both 60 min and 24 h, the values of SR [%] for did not differ statistically from the control BC – after 24 h incubation in water only a slight increase in this parameter as was noticed. Interestingly, over the 60 min incubation, the M5 material exhibited a much higher increase in SR [%] than the control (by over 4 fold), as well as other modified BC samples (**Fig. 7A**, **Fig. 7B**). However, after further incubation in water no additionally water sorption was observed (the difference between 60 min and 24 h did not exceeded 1%), meaning that the maximum water absorption capacity of the M5 was reached after 60 min (**Fig. 7B**). Somewhat similarly, M6 samples were also characterized by a much higher value of the SR [%] after 60 min, as compared to the control (by over 3 fold). The swelling capacity of M6 after 60 min was lower only than for the M5, although the dynamics of water absorption was comparable between these two modifications (**Fig. 7A**). After 24 h, similarly to the M5, only a slight increase in SR [%] of M6 was found (**Fig. 7B**). The maximum SR [%] values of M6 were comparable with the M2 and M5. The sample modified with the reference catalyst (CAT7) after 60 min showed a degree of water absorption only slightly higher than the control (**Fig. 7A**, **Fig. 7B**). However, after 24 h, the SR [%] value for M7 sample was over 3 times higher as compared to the control (**Fig. 7B**). However, the maximum degree of water sorption for M7 was lower as compared to the M1 and M3 (approx. 1.5 and 1.7 times, respectively, with the differences being statistically significant), as well as to the M5 and M6 (approx. 1.3 times for both, but the differences were not statistically significant).

As previously discussed, the BC chemical modifications studied here relied on citric acid (CA) crosslinking, facilitated by the presence of the different CATs, which released gas

during the reaction with CA and as a result of thermal decomposition. This co-effect resulted in the formation of additional space within the cellulose matrix, enabling the high water sorption capacity of the modified BC samples after drying. At the same time the nano-porosity of the BC pellicles was unchanged, as compared to the unmodified control BC (**Fig. S6, Fig. S7**).

The water molecules are trapped physically on the surface and inside the BC matrix consisting of reticulated fibrils [82]. The more space is available between the BC fibrils, the more water can penetrate and adsorb onto the material. Furthermore, the increase in the number and size of the pores results in an increase in surface area. The greater the surface area and the larger the pore size, the greater the capacity of BC to absorb water and swell [83,84].

Furthermore, in addition to an increase in swelling capacity, it was found that all of the modified BC samples demonstrated a significant increase in their capacity to hold water. This favorable water holding capacity of modified BC can also be ascribed to the differences of in microstructure obtained as a result of the crosslinking proceeding with the different CATs (**Fig. 7C, Fig. S10, Tab. S13**). For unmodified BC, total water loss was observed after just 20 min of incubation at 37 °C. Among modified samples, the quickest water loss was observed for the BC crosslinked with CAT7 (the WHC [%] reached 0 after 210 min). Samples M4 and M6 lost almost all absorbed water after 240 min, while BC modified with CATs 1-3 and CAT5 still held over 25% of their initial water volume after 240 min. Overall, the highest water retention (33%) after 240 min was observed for M3.

It has been demonstrated previously, that the amount of water lost from BC matrix to the outer environment depends on the arrangement of cellulose microfibrils [27]. As demonstrated by Kaewnopparat et al. [85], only 10% of the water in BC behaves like free bulk water. Thus, most of the water molecules within the cellulose are, more or less tightly, bound to the cellulose. According to Ul-Islam et al. [22], BC samples with smaller pore sizes are able to retain water longer than those with larger pores. This effect is due to the closely arranged microfibrils binding water molecules more efficiently, with the stronger hydrogen bonding interactions [86,87].

Here, the gas released during the crosslinking reactions was responsible for the formation of numerous air cavities. It can be assumed that water filled up these spaces during WHC analyses and exerted a pressure on the surrounding elastic cellulose fibrils, decreasing the pore sizes. This may explain why the modified samples M1-M3 in particular, absorbed water slowly, reaching maximum values of SR [%] after 24 h (**Fig. 7B**). These assumptions are consistent with the observations from our previous work, in which we used vegetable oil to *in situ* modify BC [88]. There, we hypothesized that during the process of BC development,



cellulose compressed oil droplets and had an impact on the overall morphology of the environment, with oil droplets adapting a funnel-type form within the cellulose. However, at the same time, the hydrophobic oil pushed back on the BC matrix, consisting of >98% of water, thus compressing the fibrils and changing the overall morphology of the material.

Similarly, during centrifugation (200 g) the modified BC samples also held water significantly longer, as compared to the unmodified BC (**Fig. S10**). The control sample released all absorbed water after 30 min of centrifugation, whereas all of the modified BC, regardless of the CAT used, retained more than 50% of the initial amount of water after 30 min of the process, and still retained some water after 100 min. However, in contrast to the experiment carried out at 37 °C, in this experiment we did not observe any differences between BC samples modified using different CATs. Most likely, the forces affecting the material during centrifugation are much higher than those during evaporation at elevated temperature, and therefore the relatively small differences in the morphology of modified BC pellicles were not sufficient (**Fig. S10**).

Finally, the efficiency of the crosslinking reactions in the presence of various CATs, expressed as weight percent gain (WPG%), was greatest for CAT3 (**Fig. 7D**). This result was also correlated with these samples having the highest SR [%] value (**Fig. 7B**). However, it should be noted that the M3 samples reached the maximum degree of water absorption after 24 h. Similar crosslinking efficiency was also found for reactions carried out in the presence of CAT2 and CAT4 (differences were statistically insignificant), however, for the M4 modification, despite relatively similar efficiency, water absorption capacity was markedly lower (SR [%] values for M4 were comparable to unmodified control BC). Interestingly, the M5 and M6 modifications, which reached the maximum degree of water absorption after 60 min, had efficiencies nearly 50% lower than CAT3 and with similar efficiency as with CAT1. Because the highest efficiency of the crosslinking reaction was observed in the presence of CAT3 (mixture of CAT1 and CAT2), it can be stated that the use of catalyst combinations can be more efficient with regard to the parameters discussed than application of single catalyst. However, the results obtained using CAT4, 5 and 6 showed these mixtures decrease the crosslinking efficiency, but still yield desired water sorption properties. Therefore, it cannot be stated that the effectiveness of the crosslinking reaction, measured as the weight gain of the material due to the binding of citric acid (CA) molecules, correlates with the values of SR [%] coefficient. However, this data does support our hypothesis that the primary role of the crosslinking agent is to stiffen the BC structure, while the increased ability to absorb water is essentially caused by the release gasses during thermal decomposition of CATs and the reaction of CA with CATs.

Importantly, these considerations were supported by assessment of the densities of the different modified BC pellicles (**Fig. S11, Tab. S14**). The M3 and M5 samples, previously characterized by the greatest ability to absorb water, had the lowest densities (over 30 times lower as compared to control). Interestingly, M3 and M5 yielded BCs that differed in the kinetics of water absorption and the effectiveness of the crosslinking reactions were not equal, but these differences were not reflected in their densities. In contrast, the M4 samples displayed the highest density (over 2 times higher as compared to other modifications) and absorbed the lowest volume of water. It is noteworthy, that the density of dried, unmodified BC was more than 15 times greater than M4, but no differences in water absorption were observed between these samples. Further, the efficiency of the crosslinking reaction in the presence of CAT4 did not differ statistically from reactions carried out with CAT3 and CAT5. However, these results can be explained the differences in the macro- and microstructures of these samples. As described above, CAT4 yielded high degree of BC delamination with lack of structural continuity – the air spaces were torn apart. Thus, these results confirm the key role of the formation of air spaces within BC layers, in improving the sorption properties of modified BC biomaterials, as well as the role of the crosslinking agent, which stiffens the BC structure and prevents it from collapsing during drying.

### ***3.6. Assessment of cytotoxicity of modified BC***

Potential cytotoxicity of modified BC pellicles was screened by performing extract and direct contact tests based on ISO 10993-5, as well as by assessing L929 fibroblast viability after culture on BC pellicles using confocal microscopy. No evidence of cytotoxicity of any of the modified BC samples was observed (**Fig. 8A, Fig. S12, Tab. S16**) after 24 hours of culture of L929 fibroblasts with extracts (24 hours, complete growth media, 37 °C). This indicated that no leachable toxic contaminants, such as residual citric acid or catalyst, were present, confirming that the purification protocol following modification was sufficient. Next, in the direct contact assay, where modified BC pellicle samples were placed on top of sub-confluent L929 cells in culture, we observed robust growth and normal cell morphology for control BC as well as M2, M3, M5, and M7 samples, while the cell density was somewhat reduced for the case of M1 and M6. However, for the case of M4 cell morphology was markedly altered and cell density was significantly lower (**Fig. S13, Tab. S17-S18**). These microscopic observations were confirmed with the resazurin viability assay (**Fig. 8A**). Overall, these results are consistent with the previous reports from Gyawali et al. [66], El Fawal et al. [67], Pinho & Soares [68], that indicated that citric acid was safe and a nontoxic crosslinker for biomedical applications.

Finally, confocal microscopy (**Fig. 8B,C,D**) of L929 cells cultured on modified BC pellicles confirmed presence of live (green) fibroblasts on the surface of control BC, and showed predominantly live cells on M2 sample, with only a few dead cells. However, for the case of M5, we observed a considerable amount of dead (red) fibroblasts. Thus, this additional experiment directly confirmed the results the extract and direct contact assays.

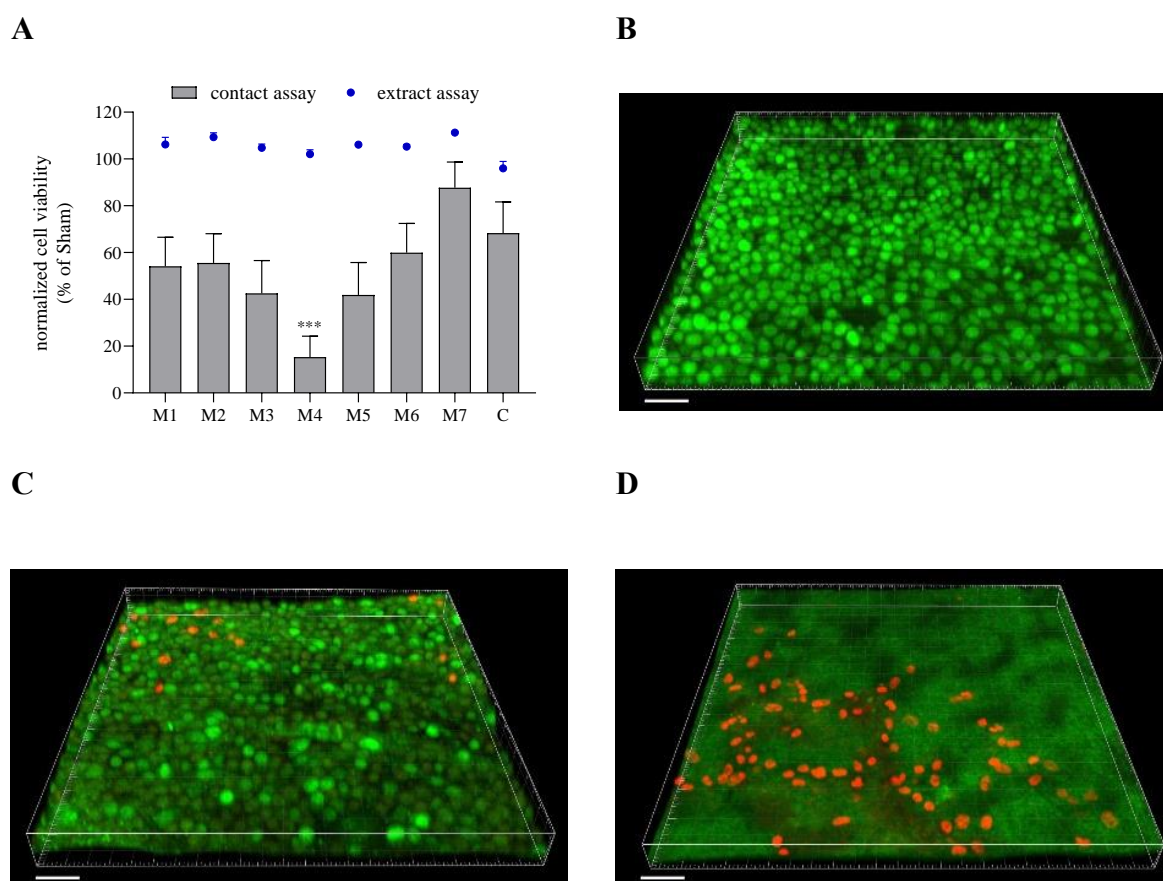

**Fig. 8.** **A**) Viability data for all tested BC samples normalized to Sham (CellCrown insert for direct contact or complete growth medium for extract) obtained with resazurin viability assay; data are presented as mean  $\pm$  standard error of the mean (SEM); the ‘\*\*\*’ mark indicates statistical differences between modifications and control ( $p < 0.001$ ). **B-D**) Visualization of L929 fibroblasts cultured on control BC (B), M2 (C) and M4 (D) samples, respectively. Green color – nuclei in live fibroblasts (SYTO-9 staining, bright green) and exposed cell-free cellulose (dim green); red color – nuclei in dead fibroblasts (propidium iodide). Scale bar = 50  $\mu$ m.

To summarize, we tested and optimized a series of crosslinking reactions of BC using citric acid and various catalysts. Based on the collective results, we can single out use of a mixture of disodium phosphate and sodium bicarbonate (1:1 mass ratio, CAT3) as the most

promising, yielding a SR [%] value of over 3300% after 24 hours. To our knowledge, the highest reported SR [%] value for modified BC was described by Figueiredo et al. [89]. As reported by these authors, BC samples were impregnated with 2-aminoethyl methacrylate (AEM) with and without addition of N,N-methylenbis(acrylamide) (MBA), yielding SR [%] values reaching 6200%. However, in contrast to our modifications, the composites obtained by those authors were not dried before the swelling analyses. Additionally, while our highest SR [%] was lower as compared to the materials obtained by Figueiredo et al. [89], our crosslinking approach has some advantages. First of all, the use of an additional polymer, AEM, filled the porous BC structure completely, which may reduce gas exchange, a feature crucial for wound closure [53]. Meanwhile, our M3-modified BC had preserved structure, including nanoporosity, and also contained numerous air cavities (**Fig. 4, Fig. 5, Fig. S3**). Another approach to obtain material with high sorption properties described in the literature involves the use BC as a substrate for the production of hydrogel. As an example, Pandey et al. [90] obtained a hydrogel composed of BC and acrylamide that was characterized by SR [%] at neutral pH of 2500%, while Amin et al. [91] synthesized BC/acrylic acid-based hydrogel with a SR [%] value exceeding 5000%. However, to obtain these hydrogels, the BC had to be dissolved or ground into powder, and the synthesis process consisted of many stages. Additionally, it is important to consider the environmental health and safety aspects: acrylamide, acrylic acid and aminoethyl methacrylate are known to have toxic and irritant properties, limiting their applicability [92]. Meanwhile, our M3 modification was obtained with use of simple and safe citric acid and disodium phosphate/sodium bicarbonate mixture. This fact cannot be neglected, especially considering the potential application of this BC material in wound dressings, where it will be in contact with fragile, exposed wound tissue.

To further assess the significance of our findings, we compared the swelling capacity of our M3-modified BC material, displaying the most promising features, to that of modern commercial dressings dedicated to highly-exuding wounds. We found that the water swelling capacity of M3 (SR [%] over 3300%) was greater than that displayed by the market-leading modern dressings, e.g. polyacrylate fiber superabsorbent dressing [93] with SR [%] of 1400% or hydrofiber superabsorbent dressing [94] with SR [%] of 2600% (**Tab. S19-S21**).

## Conclusions

The use of citric acid crosslinker combined with the various inorganic CATs provides an important novel technique yielding significant improvement in BC water-related properties after drying. Our work and findings are of high impact for virtually all types of biomedical

applications of BC. The compounds we tested as catalysts have never been used in this context of improvement of bacterial cellulose properties. We demonstrated that the formation of air cavities within the BC matrix played a key role in facilitating the absorption of large volumes of water. At the same time, our novel BC biomaterials released the absorbed water slowly, thanks to preserved nano-porous structure. These properties make the developed BC materials very promising for applications as wound dressings not only for highly-exuding, but also dry wounds [95,96]. Moisture is an essential factor of wound healing process. However, excessive amount of exudate can macerate the wound bed, degrading peri-wound skin and growth factors, and increase the risk of inflammation [97]. Our modified BC, in the dry state, may be applied as a “super-absorbent” wound dressing for exudate sequestration and maintenance of moisture levels appropriate for wound healing. Additionally, prior to drying, it is easy to envision loading the modified BC matrix with anti-inflammatory or antimicrobial drugs to be released as the dressing absorbs exudate. Alternately, in the case of dry wounds, the slow water release properties of our materials can be leveraged. For example, our modified BC biomaterial, chemisorbed with an isotonic, water-based fluid such as Ringer’s solution containing anti-inflammatory drugs, wound healing accelerators, or antimicrobial agents may restore proper moisture level and increase the rate of wound closure. Existing cellulose-based dressings saturated with such aqueous antimicrobial as polyhexanide (PHMB) or octenidine (OCT) are already used in the clinical setting [98,99].

We are aware that findings presented in this work are of *in vitro* character and require thorough testing in animal models before clinical trials may be performed. However, it should be emphasized that the application of cellulose-based dressings for purpose of exudate management is presently one of the most promising directions in chronic wound treatment [20,71]. Bearing this in mind, the excellent results for materials using our novel modification, as compared to commercial dressings, indicate that the developed method has great potential to facilitate the design of innovative new dressings dedicated to chronic wound management.

### **Acknowledgements**

The authors would like to thank the National Centre for Research and Development in Poland (Grant No. LIDER/011/221/L-5/13/NCBR/2014) for providing financial support to this work.

**Declarations of interest:** none

## References

- [1] G. Egger, J. Dixo, 2014. Beyond obesity and lifestyle: A review of 21st century chronic disease determinants, *Biomed. Res. Int.* 2014, 731685. <https://doi.org/10.1155/2014/731685>.
- [2] R.G. Frykberg, J. Banks, Challenges in the treatment of chronic wounds, *Adv. Wound Care (New Rochelle)*. 4(9) (2015) 560-582. <https://doi.org/10.1089/wound.2015.0635>.
- [3] K. Järbrink, G. Ni, H. Sönnnergren, A. Schmidtchen, C. Pang, R. Bajpai, J. Car, The humanistic and economic burden of chronic wounds: a protocol for a systematic review, *Syst. Rev.* 6(1) (2017) 15. <https://doi.org/10.1186/s13643-016-0400-8>.
- [4] V. Falanga, Wound bed preparation: science applied to practice, in: S. Calne (Ed.), *Wound bed preparation in practice*, European Wound Management Association, MEP Ltd, London, 2004, pp. 2-5.
- [5] S. L. Percival, C. Vuotto, G. Donelli, B. A. Lipsky, Biofilms and wounds: An identification algorithm and potential treatment options, *Adv. Wound Care (New Rochelle)*. 4(7) (2015) 389-397. <https://doi.org/10.1089/wound.2014.0574>.
- [6] J. Dissemmond, O. Assadian, V. Gerber, A. Kingsley, A. Kramer, D. J. Leaper, G. Mosti, A. Piatkowski de Grzymala, G. Riepe, A. Risse, M. Romanelli, R. Strohal, J. Traber, A. Vasel-Biergans, T. Wild, T. Eberlein, Classification of wounds at risk and their antimicrobial treatment with polihexanide: a practice-oriented expert recommendation, *Skin Pharmacol. Physiol.* 24(5) (2011) 245-255. <https://doi.org/10.1159/000327210>.
- [7] G. D. Winter, Formation of the scab and the rate of epithelization of superficial wounds in the skin of the young domestic pig, *Nature* 193 (1962) 293-294. <https://doi.org/10.1038/193293a0>.
- [8] P. Vowden, E. Bond, F. Meuleneire, Managing high viscosity exudate, *Wounds Int.* 11(1) (2015) 56-60. Available from URL: <https://www.woundsinternational.com/resources/details/managing-high-viscosity-exudate>
- [9] G. Han, R. Ceilley, Chronic wound healing: A review of current management and treatments, *Adv. Ther.* 34(3) (2017) 599-610. <https://doi.org/10.1007/s12325-017-0478-y>.
- [10] K. Dhaliwal, N. Lopez, Hydrogel dressings and their application in burn wound care, *Br. J. Community Nurs.* 23(9) (2018) S24-S27. <https://doi.org/10.12968/bjcn.2018.23.Sup9.S24>.

- [11] F. S. Pott, M. J. Meier, J. G. Stocco, K. Crozeta, J. D. Ribas, The effectiveness of hydrocolloid dressings versus other dressings in the healing of pressure ulcers in adults and older adults: a systematic review and meta-analysis. *Rev. Lat. Am. Enfermagem*. 22(3) (2014) 511-520. <https://doi.org/10.1590/0104-1169.3480.2445>.
- [12] Y. Yadie, H. Hu, A review on antimicrobial silver absorbent wound dressings applied to exuding wounds, *J. Microb. Biochem. Technol.* 7 (2015) 228-233. <https://doi.org/10.4172/1948-5948.1000212>.
- [13] F. X. Bernard, C. Barault, F. Juchaux, C. Laurensou, L. Apert, Stimulation of the proliferation of human dermal fibroblasts in vitro by lipidocolloid dressing, *J. Wound Care*. 14(5) (2005) 215-220. <https://doi.org/10.12968/jowc.2005.14.5.26775>.
- [14] M. Hornung, M. Ludwig, A. M. Gerrard, H. P. Schmauder, Optimizing the production of bacterial cellulose in surface culture: Evaluation of product movement influences on the bioreaction (Part 2). *Eng. Life Sci.* 6(6) (2006) 546-551. <https://doi.org/10.1002/elsc.200620163>.
- [15] A. Krystynowicz, W. Czaja, A. Wiktorowska-Jeziarska, M. Gonçaves-Miśkiewicz, M. Turkiewicz, S. Bielecki, Factors affecting the yield and properties of bacterial cellulose, *J. Ind. Microbiol. Biot.* 29(4) (2002) 189-195. <https://doi.org/10.1038/sj.jim.7000303>.
- [16] S. Bielecki, H. Kalinowska, A. Krystynowicz, K. Kubiak, M. Kołodziejczyk, M. De Groeve, Wound dressings and cosmetic materials from bacterial nanocellulose, in: M. Gama, P. Gatenholm, D. Klemm (Eds.), *Bacterial nanocellulose: a sophisticated multifunctional material, Perspectives in nanotechnology*. Boca Raton, CRC Press, Florida, 2012, pp. 157-174.
- [17] H. El-Saied, A. I. El-Diwany, A. H. Basta, N. A. Atwa, D. E. El-Ghwas, Production and characterization of economical bacterial cellulose, *BioResources*. 3(4) (2008) 1196-1217. Available from URL: [https://ojs.cnr.ncsu.edu/index.php/BioRes/article/view/BioRes\\_03\\_4\\_1196\\_ElSaied\\_EBAE\\_Economical\\_Bacterial\\_Cellulose](https://ojs.cnr.ncsu.edu/index.php/BioRes/article/view/BioRes_03_4_1196_ElSaied_EBAE_Economical_Bacterial_Cellulose)
- [18] D. R. Ruka, G. P. Simon, K. M. Dean, Altering the growth conditions of *Gluconacetobacter xylinus* to maximize the yield of bacterial cellulose, *Carbohydr. Polym.* 89(2) (2012) 613-622. <https://www.sciencedirect.com/science/journal/01448617/89/2>.

- [19] PubMed, US. Search results for: bacterial cellulose. <https://www.ncbi.nlm.nih.gov/pubmed/?term=bacterial+cellulose>, (accessed 24 February 2020).
- [20] S. P. Lin, I. L. Calvar, J. M. Catchmark, J. R. Liu, A. Demirci, K. C. Cheng, Biosynthesis, production and applications of bacterial cellulose, *Cellulose*. 20(5) (2013) 2191-2219. <https://doi.org/10.1007/s10570-013-9994-3>.
- [21] G. F. Picheth, C. L. Pirich, M. R. Sierakowski, M. A. Woehl, C. N. Sakakibara, C. F. de Souza, R. A. de Freitas, Bacterial cellulose in biomedical applications: A review. *Int. J. Biol. Macromol.* 104 (2012) 97-106. <https://doi.org/10.1016/j.ijbiomac.2017.05.171>.
- [22] M. Ul-Islam, T. Khan, J. K. Park, Water holding and release properties of bacterial cellulose obtained by in situ and ex situ modification, *Carbohydr. Polym.* 88(2) (2012) 596-603. <https://doi.org/10.1016/j.carbpol.2012.01.006>.
- [23] S. B. Lin, C. P. Hsu, L. C. Chen, H. H. Chen, Adding enzymatically modified gelatin to enhance the rehydration abilities and mechanical properties of bacterial cellulose, *Food Hydrocoll.* 23(8) (2009) 2195-2203. <https://doi.org/10.1016/j.foodhyd.2009.05.011>.
- [24] S. T. Schrecker, P. A. Gostomski, Determining the water holding capacity of microbial cellulose, *Biotechnol. Lett.* 27(19) (2005) 1435-1438. <https://doi.org/10.1007/s10529-005-1465-y>.
- [25] V. Vasconcellos, C. Farinas, The effect of the drying process on the properties of bacterial cellulose films from *Gluconacetobacter hansenii*, *Chem. Engineer. Trans.* 64 (2018) 145-150. <https://doi.org/10.3303/CET1864025>.
- [26] U. Weise, T. Maloney, H. Paulapuro, Quantification of water in different states of interaction with wood pulp fibres, *Cellulose*. 3 (1996) 189-202. <https://doi.org/10.1007/BF02228801>.
- [27] O. Shezad, S. Khan, T. Khan, J. K. Park, Physicochemical and mechanical characterization of bacterial cellulose produced with an excellent productivity in static conditions using a simple fed-batch cultivation strategy, *Carbohydr. Polym.* 82(1) (2010) 173-180. <https://doi.org/10.1016/j.carbpol.2010.04.052>.



- [28] M. Ul-Islam, W. A. Khattak, M. Kang, S. M. Kim, T. Khan, J. K. Park, Effect of post-synthetic processing conditions on structural variations and applications of bacterial cellulose, *Cellulose*. 20. (2013) 253-263. <https://doi.org/10.1007/s10570-012-9799-9>.
- [29] M. Seifert, S. Hesse, V. Kabrelian, D. Klemm, Controlling the water content of never dried and reswollen bacterial cellulose by the addition of water-soluble polymers to the culture medium, *J. Polym. Sci. Part A: Polymer Chemistry*. 42(3) (2004) 463-470. <https://doi.org/10.1002/pola.10862>.
- [30] E. E. Brown, M. P. G. Laborie, J. Zhang, Glutaraldehyde treatment of bacterial cellulose/fibrin composites impact on morphology, tensile and viscoelastic properties, *Cellulose*. 19 (2012) 127-137. <https://doi.org/10.1007/s10570-011-9617-9>.
- [31] S. T. Chang, L. C. Chen, S. B. Lin, H. H. Chen, Nano-biomaterials application: morphology and physical properties of bacterial cellulose/gelatin composites via crosslinking, *Food Hydrocoll.* 27 (2012) 137-144. <https://doi.org/10.1016/j.foodhyd.2011.08.004>.
- [32] K. Fijałkowski, A. Żywicka, R. Drozd, A. Niemczyk, A. F. Junka, D. Peitler, M. Kordas, M. Konopacki, P. Szymczyk, M. El Fray, R. Rakoczy, Modification of bacterial cellulose through exposure to the rotating magnetic field, *Carbohydr. Polym.* 133 (2015) 52-60. <https://doi.org/10.1016/j.carbpol.2015.07.011>.
- [33] P. Widsten, N. Dooley, R. Parr, J. Capricho, I. Suckling, Citric acid crosslinking of paper products for improved high-humidity performance, *Carbohydr. Polym.* 101 (2014) 998-1004. <https://doi.org/10.1016/j.carbpol.2013.10.002>.
- [34] H. Qi, Y. Huang, B. Ji, G. Sun, F. L. Qing, C. Hu, K. Yan, Anti-crease finishing of cotton fabrics based on crosslinking of cellulose with acryloyl malic acid, *Carbohydr. Polym.* 135 (2016) 86-93. <https://doi.org/10.1016/j.carbpol.2015.08.014>.
- [35] A. Meftahi, R. Khajavi, A. Rashidi, M. K. Rahimi, A. Bahador, Preventing the collapse of 3D bacterial cellulose network via citric acid, *J. Nanostructure Chem.* 8(3) (2018) 311-320. <https://doi.org/10.1007/s40097-018-0275-4>.
- [36] X. Feng, Z. Xiao, S. Sui, Q. Wang, Y. Xie, Esterification of wood with citric acid: The catalytic effects of sodium hypophosphite (SHP), *Holzforschung*. 68(4) (2014) 427-433. <https://doi.org/10.1515/hf-2013-0122>.

- [37] B. Ji, H. Qi, K. Yan, G. Sun, Catalytic actions of alkaline salts in reactions between 1, 2, 3, 4-butanetetracarboxylic acid and cellulose: I. Anhydride formation, *Cellulose*. 23(1) (2016) 259-267. <https://doi.org/10.1007/s10570-015-0810-0>.
- [38] A. Stoyanov, C. E. Miller, Cellulose fibers crosslinked with low molecular weight phosphorous containing polyacrylic acid and method U.S. Patent No. 8,722,797. Washington, DC: U.S. Patent and Trademark Office, 2014.
- [39] C. Q. Yang, FTIR spectroscopy study of ester crosslinking of cotton cellulose catalyzed by sodium hypophosphite, *Text. Res. J.* 71(3) (2001) 201-206. <https://doi.org/10.1177%2F004051750107100303>.
- [40] C. Q. Yang, D. Chen, J. Guan, Q. He, Cross-linking cotton cellulose by the combination of maleic acid and sodium hypophosphite. 1. Fabric wrinkle resistance. *Ind. Eng. Chem. Res.* 49(18) (2010) 8325-8332. <https://doi.org/10.1021/ie1007294>.
- [41] M. R. Rahman, J. C. H. Lai, S. Hamdan, A. S. Ahmed, R. Bainsi, S. F. Saleh, Combined styrene/MMA/nanoclay cross-linker effect on wood-polymer composites (WPCs), *BioResources*, 8(3) (2013) 4227-4237. Available from URL: [https://ojs.cnr.ncsu.edu/index.php/BioRes/article/view/BioRes\\_08\\_3\\_4227\\_Rahman\\_Combined\\_Styrene\\_WPC](https://ojs.cnr.ncsu.edu/index.php/BioRes/article/view/BioRes_08_3_4227_Rahman_Combined_Styrene_WPC)
- [42] S. Morita, Y. Ozaki, , Studies on Molecular Structure of Biocompatible Polymers by vibrational spectroscopy 1. ATR Spectra of Poly (2-hydroxyethyl methacrylate)(PHEMA), *Nippon Kagakkai Koen Yokoshu* 84(2) (2004) 1191.
- [43] I. Noda, Advances in two-dimensional correlation spectroscopy, *Vib. Spectrosc.* 36(2) (2004) 143-165. <https://doi.org/10.1016/j.vibspec.2003.12.016>.
- [44] S. Lê, J. Josse, F. Husson, FactoMineR: A package for multivariate analysis, *J. Stat. Softw.* 25(1) (2008) 1-18. <https://doi.org/10.18637/jss.v025.i01>.
- [45] M. Pandey, N. Mohamad, M. C. I. M. Amin, Bacterial cellulose/acrylamide pH-sensitive smart hydrogel: development, characterization, and toxicity studies in ICR mice model, *Mol. Pharm.* 11(10) (2014) 3596-3608. <https://doi.org/10.1021/mp500337r>.
- [46] N. A. Pratten, The precise measurement of the density of small samples. *J. Mater. Sci.* 16(7) (1981) 1737-1747. <https://doi.org/10.1007/BF00540619>.

- [47] T. L. Riss, R. A. Moravec, A. L. Niles, S. Duellman, H. A. Benink, T. J. Worzella, L. Minor, in: G. S. Sittampalam, A. Grossman, K. Brimacombe et al. (Eds.), *Assay Guidance Manual* [Internet], Eli Lilly & Company and the National Center for Advancing Translational Sciences, Bethesda (MD), 2016.
- [48] C. M. Park, M. Xian, Use of phosphorodithioate-based compounds as hydrogen sulfide donors. *Method. Enzymol.* 554 (2015) 127-142. <https://doi.org/10.1016/bs.mie.2014.11.032>.
- [49] S. Dhivya, V. V. Padma, E. Santhini, Wound dressings - a review. *Biomedicine (Taipei)*. 5(4) (2015) 22. <https://doi.org/10.7603/s40681-015-0022-9>.
- [50] V. Revin, E. Liyaskina, M. Nazarkina, A. Bogatyreva, M. Shchankin, Cost-effective production of bacterial cellulose using acidic food industry by-products, *Braz. J. Microbiol.* 49 (2018) 152-159. <https://doi.org/10.1016/j.bjm.2017.12.012>.
- [51] R. V. Augimeri, A. J. Varley, J. L. Strap, Establishing a role for bacterial cellulose in environmental interactions: Lessons learned from diverse biofilm-producing Proteobacteria, *Front. Microbiol.* 6 (2015) 1282. <https://doi.org/10.3389/fmicb.2015.01282>.
- [52] European Medicines Agency, Note for guidance on biotechnological/ biological products subject to changes in their manufacturing process. <https://www.ema.europa.eu/en/ich-q5e-biotechnologicalbiological-products-subject-changes-their-manufacturing-process>, (accessed 21 January 2020).
- [53] I. Sulaeva, U. Henniges, T. Rosenau, A. Potthast, Bacterial cellulose as a material for wound treatment: Properties and modifications. A review, *Biotechnol. Adv.* 33(8) (2015) 1547-1571. <https://doi.org/10.1016/j.biotechadv.2015.07.009>.
- [54] R. A. Young, Cross-linked cellulose and cellulose derivatives, *Text. Sci. Tech.* 13 (2002) 233-281. [https://doi.org/10.1016/S0920-4083\(02\)80010-X](https://doi.org/10.1016/S0920-4083(02)80010-X).
- [55] S. G. Kumbar, A. R. Kulkarni, A. M. Dave, T. M. Aminabhavi, Encapsulation efficiency and release kinetics of solid and liquid pesticides through urea formaldehyde crosslinked starch, guar gum, and starch+ guar gum matrices, *J. Appl. Polym. Sci.* 82(11) (2001) 2863-2866. <https://doi.org/10.1002/a2141>.
- [56] A. Singh, S. S. Narvi, P. K. Dutta, N. D. Pandey, External stimuli response on a novel chitosan hydrogel crosslinked with formaldehyde, *Bull. Mater. Sci.* 29(3) (2006) 233-238. <https://doi.org/10.1007/BF02706490>.

- [57] K. J. Yoon, J. H. Woo, Y. S. Seo, Formaldehyde free cross-linking agents based on maleic anhydride copolymers, *Fiber Polym.* (4) (2003) 182-187. <https://doi.org/10.1007/BF02908276>.
- [58] C. M. Welch, B. K. Andrews, Catalysts and processes for formaldehyde-free durable press finishing of cotton textiles with polycarboxylic acids, U.S. Patent No, 4,820,307 Washington, DC: U.S. Patent and Trademark Office. 1988.
- [59] J. D. Kitchens, R. T. Patton, B. S. Nadar, Wrinkle resistant cellulosic textiles, U.S. Patent No. 5,042,986 Washington, DC: U.S. Patent and Trademark Office. 1991.
- [60] O. A. Hamed, H. J. Chmielewski, D. B. McBee, Chemically cross-linked cellulose fiber and method of making same, U.S. Patent No 7,074,301. Washington DC: U.S. Patent and Trademark Office. 2006.
- [61] S. J. Geoffrey, Process of creaseproofing cellulose fibers with both glyoxal and formaldehyde, U.S. Patent No. 3,312,521. Washington DC: U.S. Patent and Trademark Office. 1967.
- [62] C.M. Welch, Mild-cure formaldehyde-free durable-press finishing of cotton textiles with glyoxal and glycols, U.S. Patent No. 4,472,167. Washington DC: U.S. Patent and Trademark Office. 1984.
- [63] C. M. Herron, W. L. Dean, D. R. Moore, J.W. Owens, H. L. Schoggen, Process for making individualized, crosslinked fibers having reduced residuals and fibers thereof, U.S. Patent No. 4,889,595. Washington, DC: U.S. Patent and Trademark Office. 1989.
- [64] R. A. Jewell, J. A. Westland, High-wet-bulk cellulosic fibers, U.S. Patent No 6,207,278. Washington, DC: U.S. Patent and Trademark Office. 2001.
- [65] C.M. Herron, D. J. Cooper, Individualized, polycarboxylic acid crosslinked fibers, U. S. Patent No. 5,183,707. Washington, DC: U.S. Patent and Trademark Office. 1993.
- [66] D. Gyawali, P. Nair, Y. Zhang, R. T. Tran, C. Zhang, M. Samchukov, M., J. Yang, Citric acid-derived in situ crosslinkable biodegradable polymers for cell delivery, *Biomaterials.* 31(34) (2010) 9092-9105. <https://doi.org/10.1016/j.biomaterials.2010.08.022>.
- [67] G. F. El Fawal, M. M. Abu-Serie, M. A. Hassan, M. S. Elnouby, Hydroxyethyl cellulose hydrogel for wound dressing: Fabrication, characterization and in vitro evaluation, *Int. J. Biol. Macromol.* 111 (2018) 649-659. <https://doi.org/10.1016/j.ijbiomac.2018.01.040>.

- [68] E. Pinho, G. Soares, Functionalization of cotton cellulose for improved wound healing, *J. Mater. Chem. B*. 6(13) (2018) 1887-1898. <https://doi.org/10.1039/C8TB00052B>.
- [69] H. W. Van Herwijnen, E. Pisanova, B. Stefke, Renewable binder for nonwoven materials, U.S. Patent No. 7,893,154. Washington, DC: U.S. Patent and Trademark Office. 2011.
- [70] N. Reddy, Y. Yang, Citric acid cross-linking of starch films. *Food Chem.* 118(3) (2010) 702-711. <https://doi.org/10.1016/j.foodchem.2009.05.050>.
- [71] S. M. Keshk, Bacterial cellulose production and its industrial applications. *J. Bioprocess Biotech.* 4(2) (2014) 1. <https://doi.org/10.4172/2155-9821.1000150>.
- [72] L. Crépy, V. Miri, N. Joly, P. Martin, J. M. Lefebvre, Effect of side chain length on structure and thermomechanical properties of fully substituted cellulose fatty esters, *Carbohydr. Polym.* 83(4) (2011) 1812-1820. <https://doi.org/10.1016/j.carbpol.2010.10.045>.
- [73] M. Schilling, M. Bouchard, H. Khanjian, T. Learner, A. Phenix, R. Rivenc, Application of chemical and thermal analysis methods for studying cellulose ester plastics, *Acc. Chem. Res.* 43(6) (2010) 888-896. <https://doi.org/10.1021/ar1000132>.
- [74] W. He, Y. Ding, J. Tu, C. Que, Z. Yang, J. Xu, Thermal conversion of primary alcohols to disulfides via xanthate intermediates: an extension to the Chugaev elimination, *Org. Biomol. Chem.* 16(10) (2018) 1659-1666. <https://doi.org/10.1039/C8OB00024G>.
- [75] D. Liu, X. Yuan, D. Bhattacharyya, The effects of cellulose nanowhiskers on electrospun poly (lactic acid) nanofibres. *Journal of Materials Science*, 47(7) (2012) 3159-3165. <https://doi.org/10.1007/s10853-011-6150-z>.
- [76] R. Drozd, R. Rakoczy, M. Konopacki, A. Frąckowiak, K. Fijałkowski, Evaluation of usefulness of 2DCorr technique in assessing physicochemical properties of bacterial cellulose, *Carbohydr. Polym.* 161 (2017) 208-218. <https://doi.org/10.1016/j.carbpol.2016.12.063>.
- [77] P. Gatenholm, D. Klemm, Bacterial nanocellulose as a renewable material for biomedical applications, *MRS Bull.* 35(3) (2010) 208-213. <https://doi.org/10.1557/mrs2010.653>.
- [78] M. Zaborowska, A. Bodin, H. Bäckdahl, J. Popp, A. Goldstein, P. Gatenholm, Microporous bacterial cellulose as a potential scaffold for bone regeneration, *Acta Biomater.* 6(7) (2010) 2540-2547. <https://doi.org/10.1016/j.actbio.2010.01.004>.

- [79] M. Ul-Islam, T. Khan, J. K. Park, Nanoreinforced bacterial cellulose–montmorillonite composites for biomedical applications, *Carbohydr. Polym.* 89(4) (2012) 1189-1197. <https://doi.org/10.1016/j.carbpol.2012.03.093>.
- [80] R. Portela, C. R. Leal, P. L. Almeida, R. G. Sobral, Bacterial cellulose: A versatile biopolymer for wound dressing applications, *Microb. Biotechnol.* 12 (2019) 586-610. <https://doi.org/10.1111/1751-7915.13392>.
- [81] C. Clasen, B. Sultanova, T. Wilhelms, P. Heisig, W. M. Kulicke, Effects of different drying processes on the material properties of bacterial cellulose membranes, *Macromol. Symp.* 244 (2006) 48-58. <https://doi.org/10.1002/masy.200651204>.
- [82] B. V. Mohite, S. V. Patil, Physical, structural, mechanical and thermal characterization of bacterial cellulose by *G. hansenii* NCIM 2529, *Carbohydr. Polym.* 106 (2014) 132-141. <https://doi.org/10.1016/j.carbpol.2014.02.012>.
- [83] J. Guo, J. M. Catchmark, Surface area and porosity of acid hydrolyzed cellulose nanowhiskers and cellulose produced by *Gluconacetobacter xylinus*, *Carbohydr. Polym.* 87(2) (2012) 1026-1037. <https://doi.org/10.1016/j.carbpol.2011.07.060>.
- [84] A. Meftahi, R. Khajavi, A. Rashidi, M. Sattari, M. E. Yazdanshenas, M. Torabi, The effects of cotton gauze coating with microbial cellulose, *Cellulose.* 17(1) (2010) 199-204. <https://doi.org/10.1007/s10570-009-9377-y>.
- [85] S. Kaewnopparat, K. Sansernluk, D. Faroongsarng, Behavior of freezable bound water in the bacterial cellulose produced by *Acetobacter xylinum*: An approach using thermoporosimetry. *Aaps. PharmSciTech.* 9(2) (2008) 701-707. <https://doi.org/10.1208/s12249-008-9104-2>.
- [86] H. Ougiya, K. Watanabe, T. Matsumura, F. Yoshinaga, Relationship between suspension properties and fibril structure of disintegrated bacterial cellulose, *Biosci. Biotech. Bioch.* 62(9) (1998) 1714-1719. <https://doi.org/10.1271/bbb.62.1714>.
- [87] N. Shah, J. H. Ha, J. K. Park, Effect of reactor surface on production of bacterial cellulose and water soluble oligosaccharides by *Gluconacetobacter hansenii* PJK, *Biotechnol. Bioproc. E.* 15(1) (2010) 110-118. <https://doi.org/10.1007/s12257-009-3064-6>.
- [88] A. Żywicka, A. F. Junka, P. Szymczyk, G. Chodaczek, J. Grzesiak, P. P. Sedghizadeh, K. Fijałkowski, Bacterial cellulose yield increased over 500% by supplementation of medium with

vegetable oil, Carbohydr. Polym. 199 (2018) 294-303.  
<https://doi.org/10.1016/j.carbpol.2018.06.126>.

[89] A. R. Figueiredo, A. G. Figueiredo, N. H. Silva, A. Barros-Timmons, A. Almeida, A. J. Silvestre, C. S. Freire, Antimicrobial bacterial cellulose nanocomposites prepared by in situ polymerization of 2-aminoethyl methacrylate, Carbohydr. Polym. 123 (2015) 443-453.  
<https://doi.org/10.1016/j.carbpol.2015.01.063>.

[90] M. Pandey, M. Amin, M. C. Igbal, N. Ahmad, M. M. Abeer, Rapid synthesis of superabsorbent smart-swelling bacterial cellulose/acrylamide-based hydrogels for drug delivery. Int. J. Polym. Sci. (2013) <https://doi.org/10.1155/2013/905471>.

[91] M. C. I. M. Amin, N. Ahmad, N. Halib, I. Ahmad, Synthesis and characterization of thermo-and pH-responsive bacterial cellulose/acrylic acid hydrogels for drug delivery. Carbohydr. Polym. 88(2) (2012) 465-473.  
<https://doi.org/10.1016/j.carbpol.2011.12.022>.

[92] Department of health and human services: Niosh Skin Notation (SK) Profiles, [https://www.cdc.gov/niosh/topics/skin/skin-notation\\_profiles.html](https://www.cdc.gov/niosh/topics/skin/skin-notation_profiles.html), (accessed 2 March 2020).

[93] <http://www.urgomedical.com>, (accessed 2 March 2020).

[94] <https://www.convatec.com>, (accessed 2 March, 2020).

[95] O. M. Alvarez, T. J. Phillips, J. O. Menzoian, M. Patel, A. Andriessen, An RCT to compare a bio-cellulose wound dressing with a non-adherent dressing in VLU. J. Wound Care. 21(9) (2012) 448-453. <https://doi.org/10.12968/jowc.2012.21.9.448>.

[96] J. Stephen-Haynes, R. Callaghan, A. Wibaux, P. Johnson, N. Carty, Clinical evaluation of a thin absorbent skin adhesive dressing for wound management, J. Wound Care. 23(11) (2014) 532-542. <https://doi.org/10.12968/jowc.2014.23.11.532>.

[97] U. J. Adderley, Managing wound exudate and promoting healing, Br. J. Community Nurs. 15(1) (2010) 15-20. <https://doi.org/10.12968/bjcn.2010.15.Sup1.46907>.

[98] T. Wild, M. Bruckner, M. Payrich, C. Schwarz, T. Eberlein, A. Andriessen, Eradication of methicillin-resistant *Staphylococcus aureus* in pressure ulcers comparing a polyhexanide-containing cellulose dressing with polyhexanide swabs in a prospective randomized study. Adv. Skin Wound Care. 25(1) (2012) 17-22.  
<https://doi.org/10.1097/01.ASW.0000410686.14363.ea>.

[99] S. Moritz, C. Wiegand, F. Wesarg, N. Hessler, F. A. Müller, D. Kralisch, D. Fischer, Active wound dressings based on bacterial nanocellulose as drug delivery system for octenidine, *Int. J. Pharm.* 471(1-2) (2014) 45-55. <https://doi.org/10.1016/j.ijpharm.2014.04.062>.
